# Supplementary material for: Constrained catecholamines gain β2AR selectivity through allosteric effects on pocket dynamics
Source: PubMed Central journal article supplement (PMC10104803; doi:10.1038/s41467-023-37808-y), 2023-04-14
Supplement: 41467_2023_37808_MOESM1_ESM.pdf [file 41467_2023_37808_MOESM1_ESM.pdf]

## Supplementary Figures

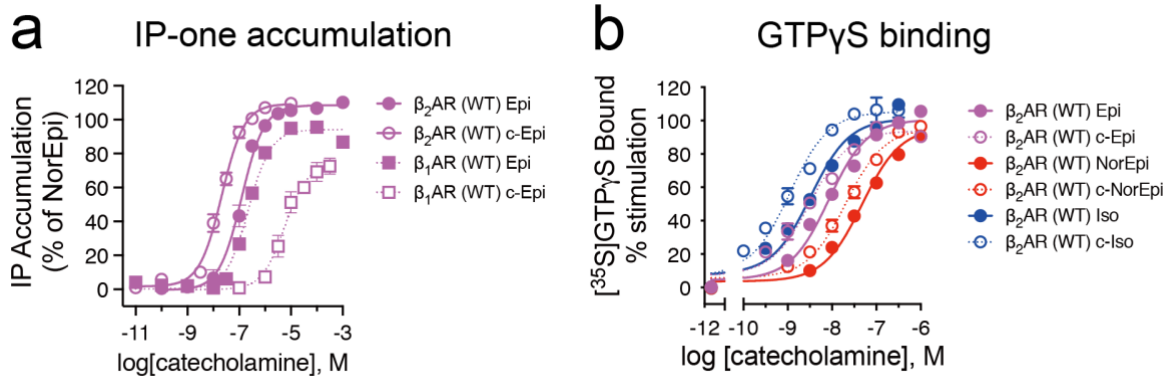

**Supplementary Figure 1 | Constrained catecholamines show increased potency to activate the  $\beta_2$ AR compared to non-constrained forms.** **a**, c-Epi has a smaller  $EC_{50}$  than Epi for the  $\beta_2$ AR and has a larger  $EC_{50}$  than Epi for the  $\beta_1$ AR in the IP-one G protein activation assay. Data are given as mean  $\pm$  SEM of  $n=4$  ( $\beta_1$ AR c-Epi),  $n=6$  ( $\beta_2$ AR Epi), and  $n=7$  ( $\beta_2$ AR Epi,  $\beta_2$ AR c-Epi) independent experiments. **b**, c-Epi, c-NorEpi and c-ISO show increased potency than Epi, NorEpi and ISO for the  $\beta_2$ AR in [ $^{35}$ S]GTP $\gamma$ S binding assay. Data are given as mean  $\pm$  SEM of  $n=3$  (for all samples) independent experiments. Source data are provided as a Source data file.

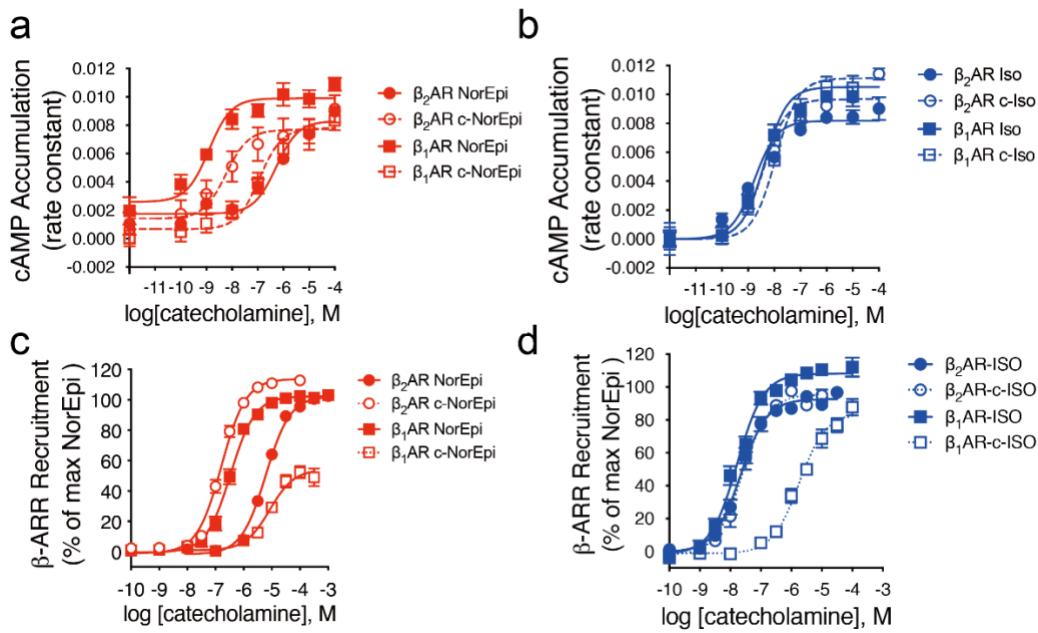

### Supplementary Figure 2 | Comparison of NorEpi, c-NorEpi, ISO and c-ISO in cAMP

**accumulation and arrestin recruitment assay. a**, c-NorEpi shows  $\beta_2$ AR selectivity in a cAMP

accumulation assay. **b**, ISO and c-ISO shows similar  $EC_{50}$  in a cAMP accumulation assay. **c**, while

NorEpi is  $\beta_1$ AR-selective in arrestin recruitment, c-NorEpi is  $\beta_2$ AR-selective in the same assay. **d**,

Compared to ISO, c-ISO shows decreased potency to activate the  $\beta_1$ AR but not  $\beta_2$ AR in arrestin

recruitment assay. For a,b, data are given as mean  $\pm$  SEM of n=3 (for NorEpi, ISO and c-ISO), and

n=9 (for c-NorEpi) independent experiments. For **c**, data are given as mean  $\pm$  SEM of n=9 (for

NorEpi), and n=13 (for c-NorEpi); for **d**, data are given as mean  $\pm$  SEM of n=9 ( $\beta_1$ AR Iso), n=12

( $\beta_2$ AR Iso), n= 14 ( $\beta_1$ AR c-ISO), and n= 21 ( $\beta_2$ AR c-ISO). Source data are provided as a Source data

file.

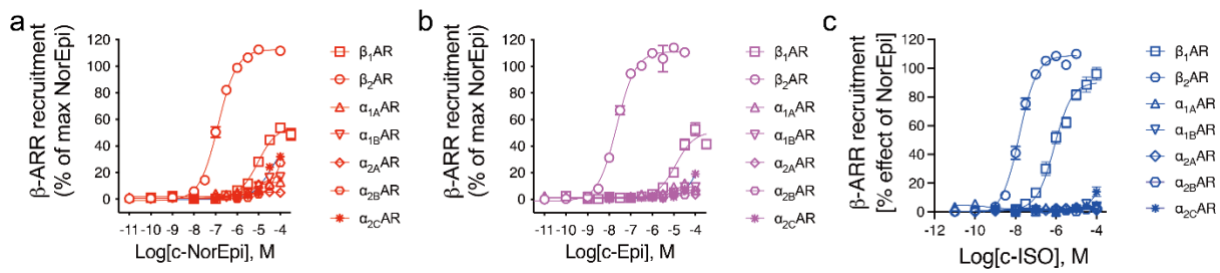

**Supplementary Figure 3 | The three contained catecholamines show  $\beta_2$ AR selectivity in a  $\beta$ -arrestin recruitment assay among  $\beta_1$ AR and  $\alpha$ ARs.** Of the 7 adrenoceptors tested, the  $\beta_2$ AR shows highest potency to recruit  $\beta$ -arrestin for c-NorEpi (a), c-Epi (b) and c-ISO (c). Data are given as mean  $\pm$  SEM of  $n=4$  (for  $\alpha_{1B}$ AR,  $\alpha_{2B}$ AR,  $\alpha_{2C}$ AR),  $n=6$  ( $\alpha_{1A}$ AR,  $\alpha_{2A}$ AR, for c-NorEpi),  $n=8$  ( $\alpha_{1A}$ AR,  $\alpha_{2A}$ AR, for c-Epi and c-Iso),  $n=13$  ( $\beta_1$ AR,  $\beta_2$ AR, for c-NorEpi),  $n=14$  ( $\beta_1$ AR for c-Iso),  $n=15$  ( $\beta_1$ AR for c-Epi), and  $n=21$  ( $\beta_2$ AR for c-Epi, c-Iso) independent experiments. Source data are provided as a Source data file.

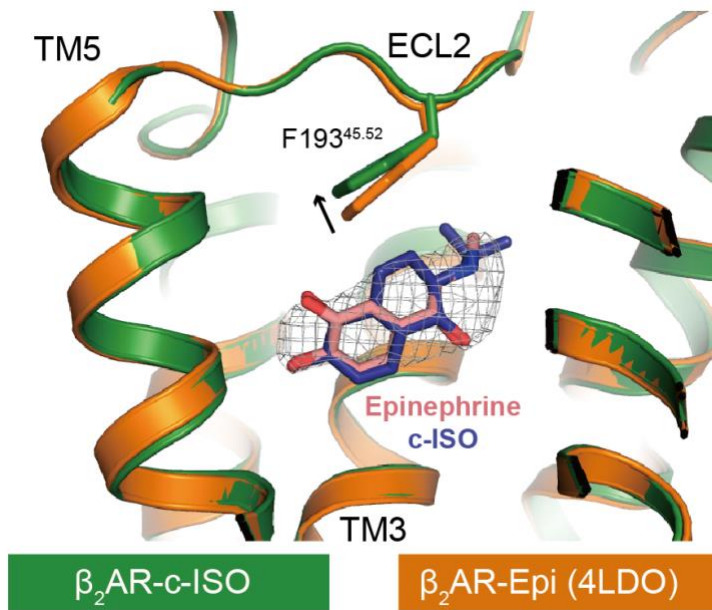

**Supplementary Figure 4 | F<sup>45.52</sup> shows upward movement upon c-ISO binding compared to Epi binding.** The grey mesh shows the simulated omit fo-fc density of the c-ISO countered at 3.0  $\sigma$ .

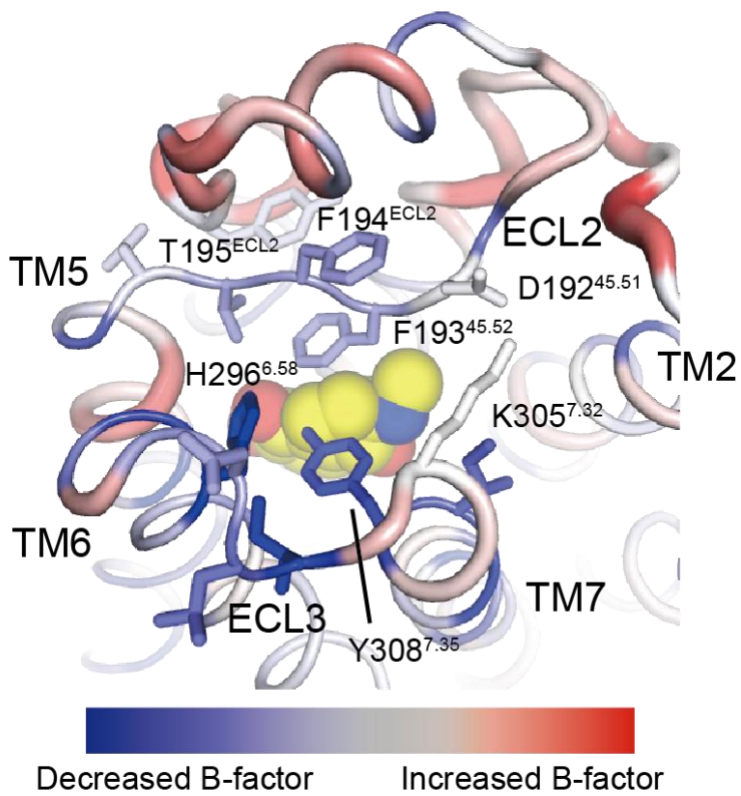

**Supplementary Figure 5 | c-Epi binding results in reduced flexibility of the ECL2 and ECL3 compared to Epi bound  $\beta_2$ AR as revealed by decreased normalized B-factors (blue color).**

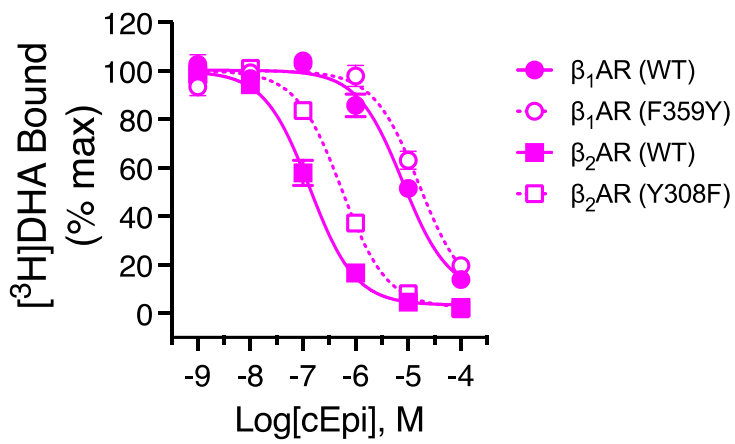

**Supplementary Figure 6 | The Y/F<sup>7.35</sup> difference is not responsible for the c-Epi selectivity towards the  $\beta_2$ AR.** The Y308<sup>7.35</sup>F mutation slightly decreased c-Epi affinity in the  $\beta_2$ AR, while the F359<sup>7.35</sup>Y mutation also slightly decreased c-Epi affinity in the  $\beta_1$ AR. Data are given as mean  $\pm$  SEM of n=4 (for all samples) independent experiments. Source data are provided as a Source data file.

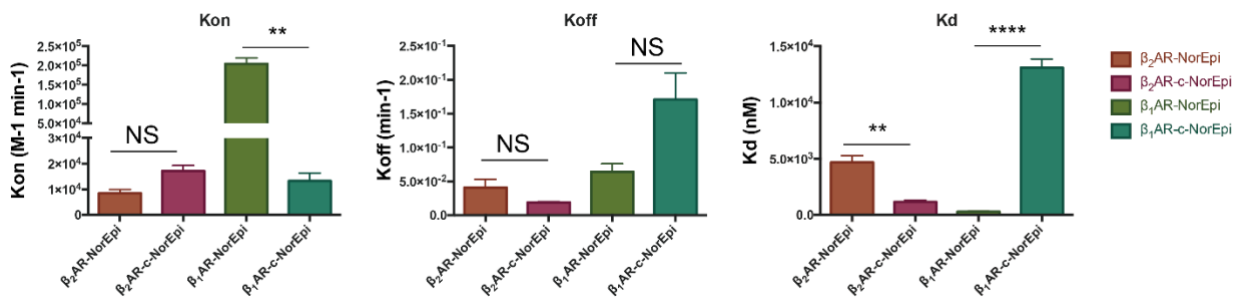

**Supplementary Figure 7 | Binding kinetics studies of c-NorEpi and NorEpi on the  $\beta_1$ AR and  $\beta_2$ AR.** Statistic analysis of the binding kinetics values for NorEpi and c-NorEpi were performed using 2-way ANOVA analysis. (\*:  $P < 0.05$ , \*\*:  $P < 0.005$ , \*\*\*:  $P < 0.0005$ , \*\*\*\*:  $P < 0.0001$ ). Data are given as mean  $\pm$  SEM of  $n=4$  ( $\beta_2$ AR, for NorEpi and c-NorEpi),  $n=8$  ( $\beta_1$ AR, for norEpi),  $n=5$  ( $\beta_1$ AR, for cNorEpi) independent experiments. Source data are provided as a Source data file.

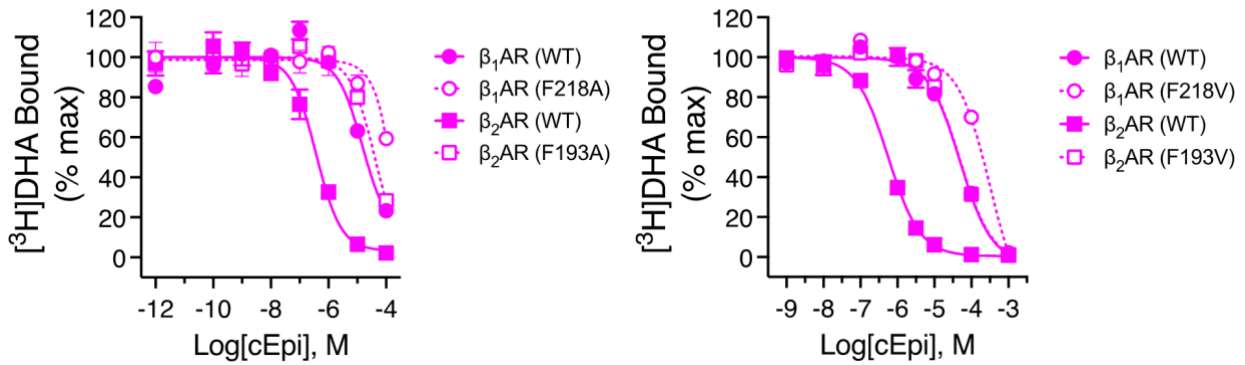

**Supplementary Figure 8 | F<sup>45.52</sup>A or F<sup>45.52</sup>V mutation decreases c-Epi affinity in both β<sub>1</sub>AR and β<sub>2</sub>AR.** Data are given as mean ± SEM of n=6 (β<sub>1</sub>AR and β<sub>1</sub>AR(F218A) and β<sub>2</sub>AR and β<sub>2</sub>AR(F193A), n=6 (β<sub>1</sub>AR and β<sub>1</sub>AR(F218V) and β<sub>2</sub>AR and β<sub>2</sub>AR(F193V) independent experiments. Source data are provided as a Source data file.



$\beta_1AR_{in}/\beta_2AR_{out}$

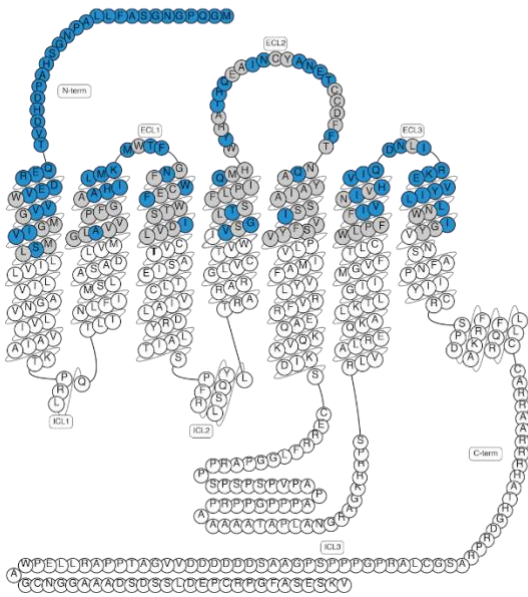

$\beta_2AR_{in}/\beta_1AR_{out}$

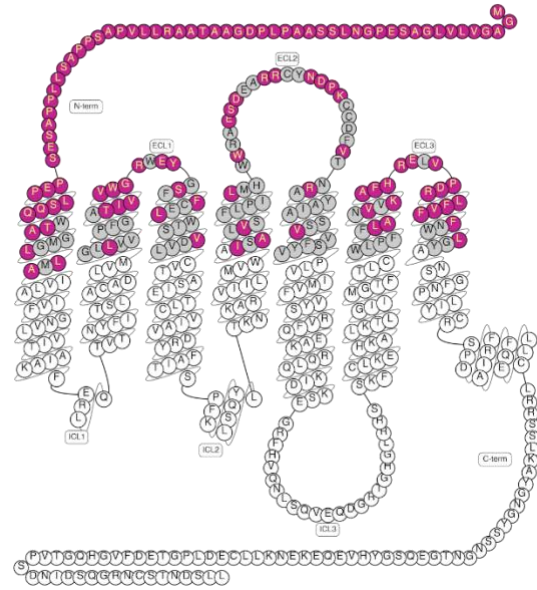

**Supplementary Figure 9 | Construct design of  $\beta_1AR_{in}/\beta_2AR_{out}$  and  $\beta_2AR_{in}/\beta_1AR_{out}$  chimeras.** The figure is modified from a previous publication<sup>1</sup>.

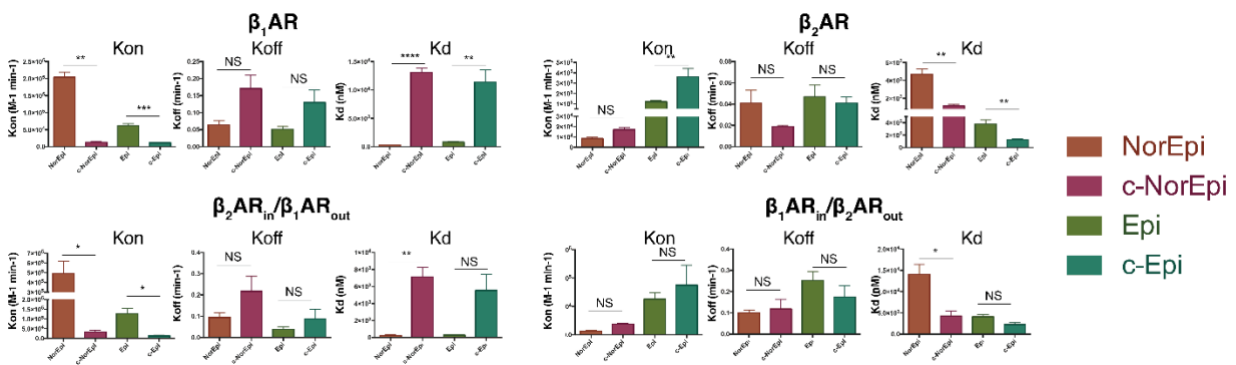

**Supplementary Figure 10| Comparison of binding kinetics of Epi, c-Epi, NorEpi, c-NorEpi on  $\beta_1AR$ ,  $\beta_2AR$  as well as the  $\beta_1AR_{in}/\beta_2AR_{out}$  and  $\beta_2AR_{in}/\beta_1AR_{out}$  chimeras.** Statistic analysis of the binding kinetics values were performed using 2-way ANOVA analysis. (\*:  $P < 0.05$ , \*\*:  $P < 0.005$ , \*\*\*:  $P < 0.0005$ , \*\*\*\*:  $P < 0.0001$ ). Data are given as mean  $\pm$  SEM of  $n=3$  ( $\beta_1AR$  for Epi),  $n=3$  ( $\beta_2AR$  for Epi),  $n=3$  ( $\beta_1AR$  for NorEpi),  $n=5$  ( $\beta_2AR$  for NorEpi),  $n=6$  ( $\beta_1AR$  for cEpi),  $n=6$  ( $\beta_2AR$  for cEpi),  $n=5$  ( $\beta_1AR$  for cNorEpi),  $n=5$  ( $\beta_2AR$  for cNorEpi),  $n=4$  ( $\beta_2AR_{in}/\beta_1AR_{out}$ ),  $n=4$  ( $\beta_1AR_{in}/\beta_2AR_{out}$ ) independent experiments. Source data are provided as a Source data file.

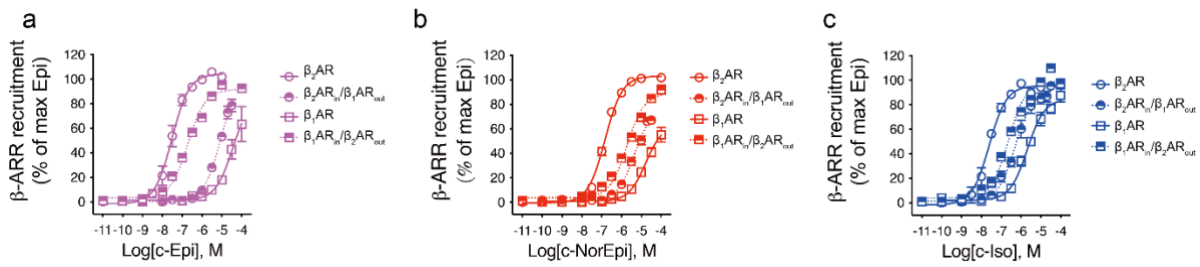

**Supplementary Figure 11| Exchanging the extracellular vestibule between the  $\beta_1$ AR and  $\beta_2$ AR results in the change of the EC<sub>50</sub> values for the constrained catecholamines in a  $\beta$ -arrestin recruitment assay.** The  $\beta_1$ AR<sub>in</sub>/  $\beta_2$ AR<sub>out</sub> has smaller EC<sub>50</sub> than the  $\beta_1$ AR for c-NorEpi (a), c-Epi (b) and c-ISO (c), while the  $\beta_2$ AR<sub>in</sub>/ $\beta_1$ AR<sub>out</sub> has larger EC<sub>50</sub> than the  $\beta_2$ AR for all three constrained catecholamines. Data are given as mean  $\pm$  SEM of n=4 ( $\beta_1$ AR for c-Epi), n=5 ( $\beta_1$ AR for c-NorEpi, c-Iso), n=6 ( $\beta_2$ AR for c-Epi, c-Iso), n=8 ( $\beta_1$ AR<sub>in</sub>/ $\beta_2$ AR<sub>out</sub> for c-NorEpi, c-Iso), n=9 ( $\beta_2$ AR for c-NorEpi), n=10 ( $\beta_2$ AR<sub>in</sub>/ $\beta_1$ AR<sub>out</sub> for c-NorEpi, c-Iso), n=11 ( $\beta_2$ AR<sub>in</sub>/ $\beta_1$ AR<sub>out</sub> for c-Epi), and n=12 ( $\beta_1$ AR<sub>in</sub>/ $\beta_2$ AR<sub>out</sub> for c-Epi) independent experiments. Source data are provided as a Source data file.

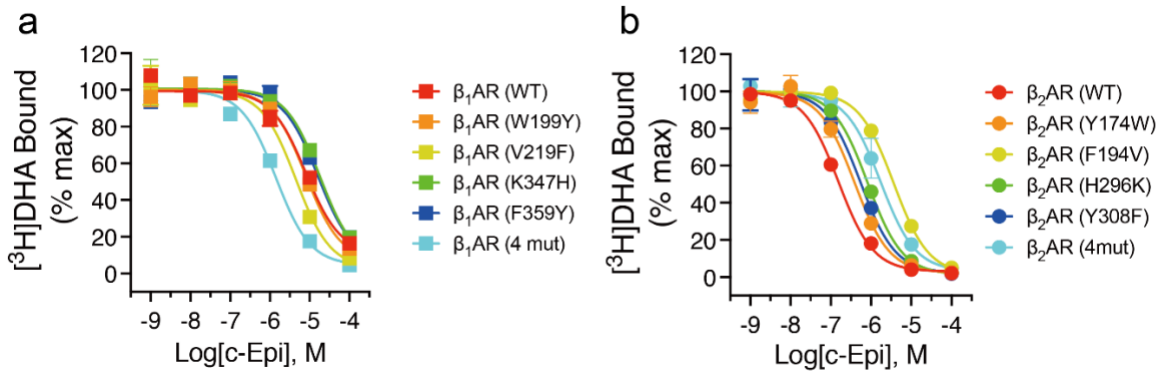

**Supplementary Figure 12 | Agonist competition binding curves of c-Epi to  $\beta_1\text{AR}$  and  $\beta_2\text{AR}$  mutations.** **a**, c-Epi competition curves show leftward shift for  $\beta_1\text{AR}$ -V219F and  $\beta_1\text{AR}$ -4mut compared to WT  $\beta_1\text{AR}$ . **b**, c-Epi competition curves show rightward shift for all four single mutations as well as  $\beta_2\text{AR}$ -4mut compared to WT  $\beta_2\text{AR}$ . Data are given as mean  $\pm$  SEM of  $n=4$  (all samples) independent experiments. Source data are provided as a Source data file.

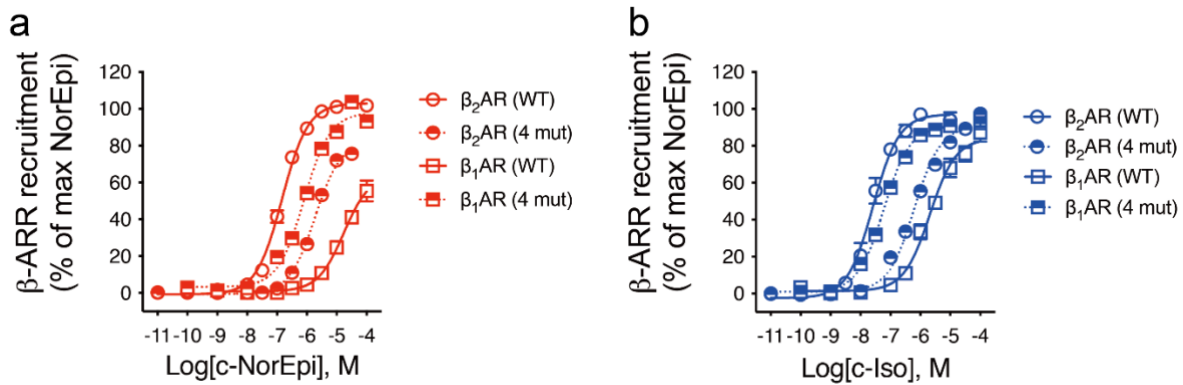

**Supplementary Figure 13 | Mutating 4 residues around the F<sup>45.52</sup> affect c-NorEpi and c-ISO affinities in the  $\beta_1$ AR and  $\beta_2$ AR. a**, Mutating the 4 residues surrounding F<sup>45.52</sup> reduced c-NorEpi affinity for the  $\beta_2$ AR and increased c-NorEpi affinity for the  $\beta_1$ AR in a  $\beta$ -arrestin recruitment assay. **b**, Mutating the 4 residues has similar effects on  $\beta_1$ AR and  $\beta_2$ AR's affinity for c-ISO in  $\beta$ -arrestin recruitment assay. Data are given as mean  $\pm$  SEM of n=5 ( $\beta_1$ AR (WT),  $\beta_1$ AR (4 mut)), n=6 ( $\beta_2$ AR (WT) for c-Iso), n=7 ( $\beta_2$ AR (4 mut) for c-NorEpi), n=8 ( $\beta_2$ AR (4 mut) for c-Iso), and n=9 ( $\beta_2$ AR (WT) for c-NorEpi) independent experiments. Source data are provided as a Source data file.

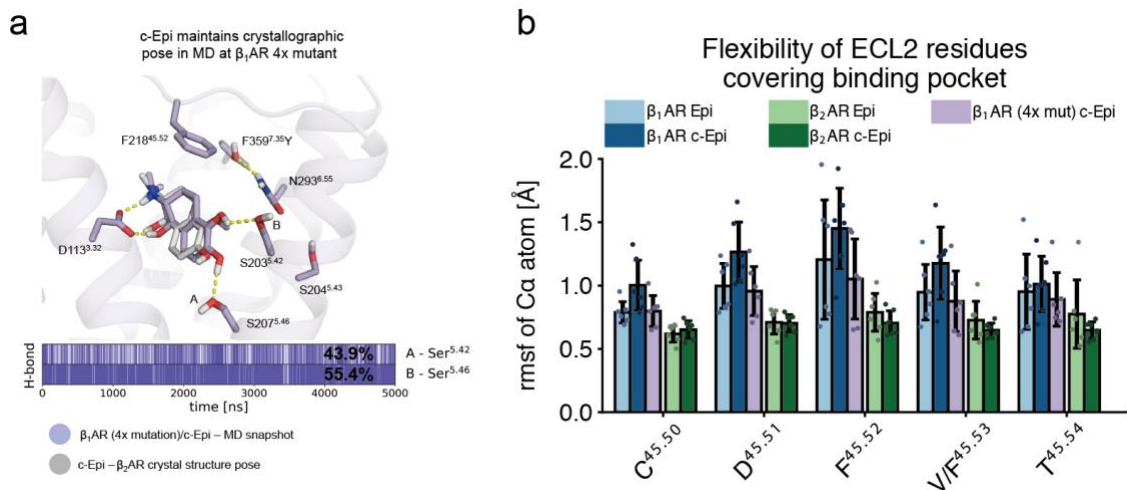

**Supplementary Figure 14 | c-Epi maintains its pose in simulations in the  $\beta_1$ AR\_4mut and the simulations show reduced ECL2 movement in  $\beta_1$ AR\_4mut compared to  $\beta_1$ AR. a**, c-Epi maintains its crystallographic pose in the  $\beta_1$ AR\_4mut in simulations. A representative frame of the simulations is displayed in purple and the crystallographic pose of c-Epi in gray. The trace plot indicated the presence of the canonical hydrogen bonds to Ser<sup>5.42</sup> and Ser<sup>5.46</sup>. If colored, the interaction is present, if left blank it is not. The trace is displayed for one representative trajectory. The percentage value is the mean over six simulations, 5  $\mu$ s each. **b**, The rmsf of the Ca atoms F<sup>45.52</sup> and its surrounding residues is displayed. The ECL2 flexibility is reduced for the  $\beta_1$ AR\_4mut c-Epi condition compared to  $\beta_1$ AR-c-Epi. Data are given as mean  $\pm$  SEM of 5 independent experiments.

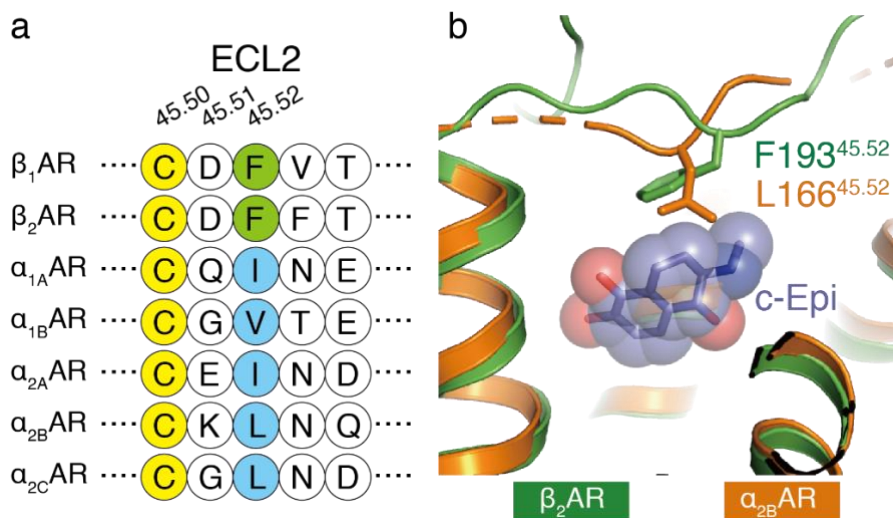

**Supplementary Figure 15 | The F<sup>45.52</sup> is not conserved in the  $\alpha$ ARs.** **a**, sequence alignment of ECL2 between  $\beta_1$ AR,  $\beta_2$ AR and 5  $\alpha$ -adrenergic receptors ( $\alpha$ ARs). F<sup>45.52</sup> is branched-chain amino acids (valine, leucine or isoleucine) in the  $\alpha$ ARs. **b**, Structure alignment of  $\beta_2$ AR-c-Epi (this study) and  $\alpha_{2B}$ AR (PDB: 6K41) suggest a leucine residue at position 45.52 may clash with the connecting carbons of c-Epi.

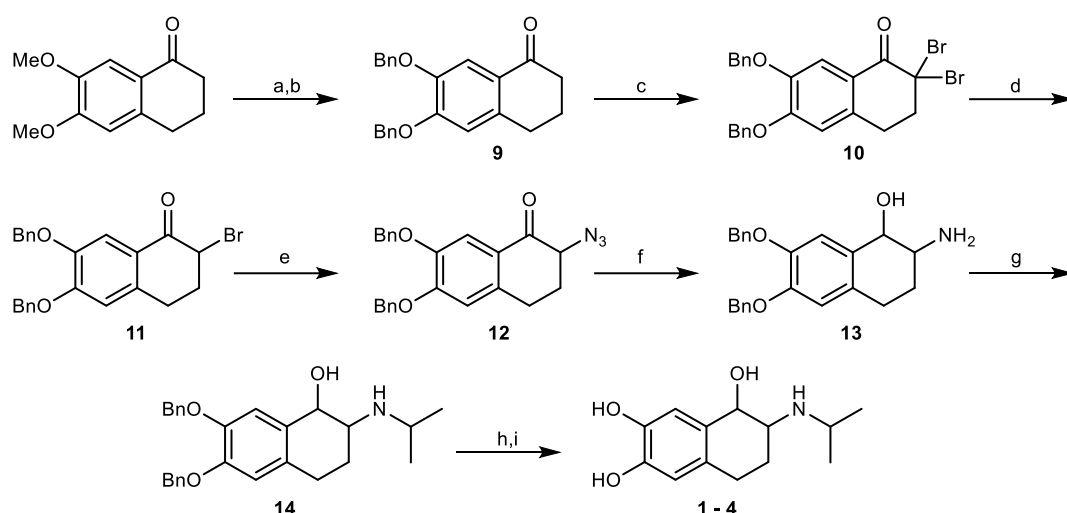

### Supplementary Figure 16 | Synthesis of the conformationally restricted catecholamines **1-4**.

The conformationally restricted catecholamines **1-4** were synthesized from 6,7-dimethoxy-1-tetralone. The reaction sequence started with an exchange of the *O*-methyl substituents by benzyl groups using  $\text{AlCl}_3$  in toluene<sup>3</sup> and subsequent reaction of the resulting catechol with benzyl bromide in acetone in presence of sodium iodide to give dibenzyloxyketone **9**. Bromination of **9** gave the  $\alpha,\alpha$ -dibromo derivative **10**, which could be selectively reduced to the  $\alpha$ -bromoketone **11**. Treatment of the synthetic intermediate **11** with sodium azide in DMF gave access to the azidoketone **12**, which was directly reduced with lithium aluminum hydride in 1,2-dichloroethane to afford the aminoalcohol **13** (*cis/trans* 1:1). Introduction of an isopropyl group was performed by reductive alkylation. Separation of all four isomers of the resulting products (**14**) on chiral HPLC and subsequent hydrogenolytic debenzylation yielded the four stereoisomers of the final products **1-4**<sup>4</sup>. Reagents and conditions: a)  $\text{AlCl}_3$ , toluene, reflux, 1 h; b) benzyl bromide,  $\text{K}_2\text{CO}_3$ , NaI, acetone, reflux, 16 h; c)  $\text{Br}_2$ ,  $\text{Et}_2\text{O}$ , r.t., 5 min; d) diethyl phosphite,  $\text{Et}_3\text{N}$ , THF, 0 °C to r.t., 72 h; e)  $\text{NaN}_3$ , HOAc, DMF, r.t., 1 h; f)  $\text{LiAlH}_4$  in THF, 1,2-DCE, r.t., 16 h; g) acetone,  $\text{NaBH}(\text{OAc})_3$ , 1,2-DCE, r.t., 96 h; h) Chromatography (ChiralPak IC column); i)  $\text{H}_2$ , Pd/C, MeOH, r.t., 30-90 min.



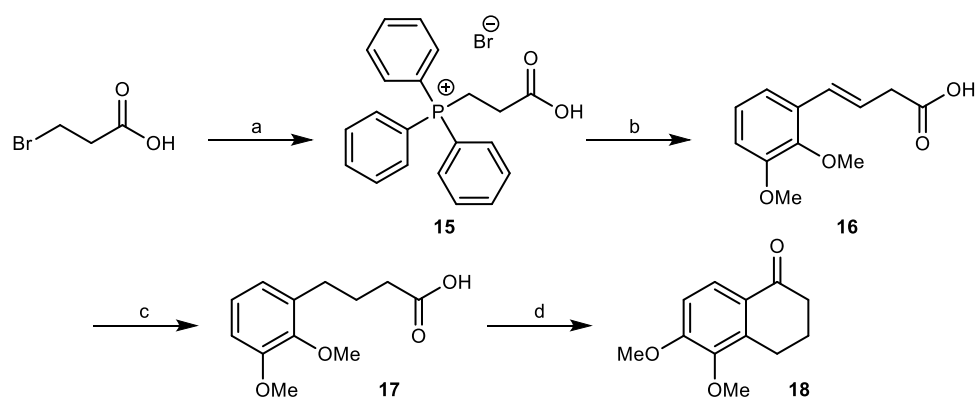

**Supplementary Figure 17 | Synthesis of 5,6-dimethoxy-1-tetralone.** 5,6-Dimethoxy-1-tetralone was synthesized starting from 3-bromopropanoic acid following a modified literature protocol<sup>5</sup>. Alkylation of triphenylphosphine with 3-bromopropanoic acid in acetonitrile gave the phosphonium bromide **15**, which was subjected to a Wittig-reaction with 2,3-dimethoxybenzaldehyde. Subsequent hydrogenation afforded the cyclization precursor **17**. Upon treatment of **17** with polyphosphoric acid, ring closure was promoted resulting in formation of the building block **18**. Reagents and conditions: a) triphenylphosphine, MeCN, reflux, 12 h; b) NaH, THF, DMSO, r.t., 5 min, then 2,3-dimethoxybenzaldehyde, r.t., 2 h; c) H<sub>2</sub>, Pd/C, MeOH, r.t., 2 h; d) polyphosphoric acid, 70 °C, 1 h.

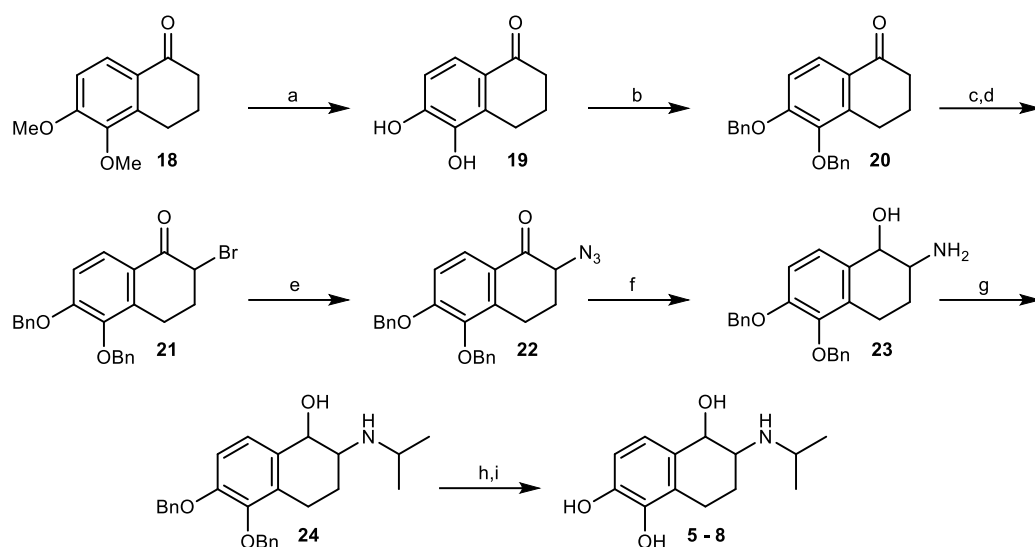

### Supplementary Figure 18 | Synthesis of the conformationally restricted catecholamines 5-8.

The conformationally restricted catecholamines **5-8** were synthesized from 5,6-dimethoxy-1-tetralone<sup>6,7</sup>. The reaction sequence started by an exchange of the *O*-methyl substituents by benzyl groups using  $\text{AlCl}_3$  in toluene<sup>3</sup> and subsequent reaction of the resulting catechol **19** with benzyl bromide in acetone in presence of sodium iodide to give dibenzyloxyketone **20**. Bromination of **20** gave the  $\alpha,\alpha$ -dibromo intermediate, which could be selectively reduced to the  $\alpha$ -bromoketone **21**. Treatment of the synthetic intermediate **21** with sodium azide in DMF gave access to the azidoketone **22**. Reduction of **22** with lithium aluminum hydride resulted in formation of all four isomers of **23** (2:3 *cis/trans* ratio). After reductive alkylation of **23**, the four isomers of the resulting isopropyl amines (**24**) were resolved on chiral HPLC to give three fractions: (*S,S*)-isomer, a mixture of (*R,R*)- and (*R,S*)-isomers, and the (*S,R*)-isomer. The individual fractions were deprotected by catalytic hydrogenolysis to yield the stereoisomers **7** (*S,S*) and **6** (*S,R*) as well as a mixture of **8** (*R,R*) and **5** (*R,S*), which could be separated by preparative HPLC giving access to the pure stereoisomers. Without further information on the stereochemistry, the designation c-ISO refers to the 5,6-(*R,R*) isomer. Reagents and conditions: a)  $\text{AlCl}_3$ , toluene, reflux, 1 h; b) benzyl bromide,  $\text{K}_2\text{CO}_3$ , NaI, acetone, reflux, 2 h; c)  $\text{Br}_2$ ,  $\text{Et}_2\text{O}$ , r.t., 1 h; d) diethyl phosphite,  $\text{Et}_3\text{N}$ , THF, 0 °C to r.t., 16 h; e)  $\text{NaN}_3$ , HOAc, DMF, 0 °C, 3 h; f)  $\text{LiAlH}_4$  in THF, 1,2-DCE, r.t., 4 h; g) acetone,  $\text{NaBH}(\text{OAc})_3$ , 1,2-DCE, r.t., 16 h; h) preparative HPLC (ChiralPak IC column); i)  $\text{H}_2$ , Pd/C, MeOH, r.t., 30-90 min, preparative HPLC (C-8 column).

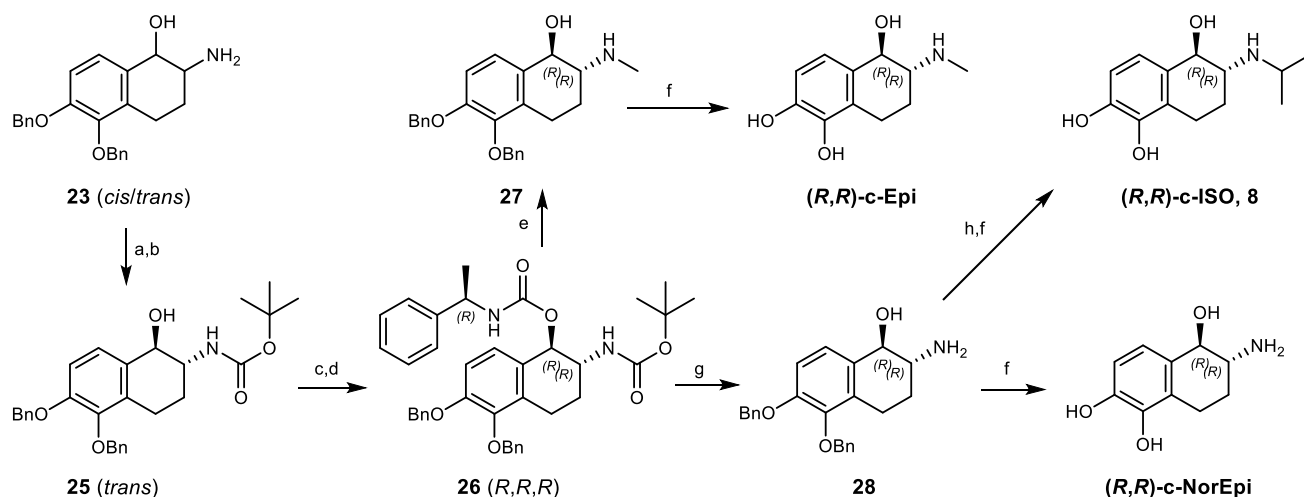

**Supplementary Figure 19 | Synthesis of (R,R)-c-Epi, (R,R)-c-NorEpi and (R,R)-c-ISO.** (*R,R*)-c-ISO, (*R,R*)-c-Epi and (*R,R*)-c-NorEpi were synthesized from the central building block **26**, which could be readily prepared on a multigram scale. Hence, the aminoalcohol **23** (mixture of four stereoisomers) was *N*-alkoxycarbonylated to give the Boc-protected intermediate **25**. Column chromatography and subsequent recrystallization allowed complete removal of *cis* isomers. Racemic *trans*-**25** was subjected to an organotin-catalyzed addition reaction<sup>8</sup> with chiral methylbenzyl isocyanate yielding a 1:1 mixture of (*R,R,R*)- and (*S,S,R*)-dicarbamate (**26**). Repeated recrystallization from toluene/isohehexane yielded pure (*R,R,R*)-**26** (>99.5% *de*), as confirmed by chiral HPLC. TBAF-promoted deprotection of (*R,R,R*)-**26** yielded the primary amine<sup>9</sup> **28** which could be *N*-isopropylated and *O*-deprotected to afford (*R,R*)-c-ISO (**8**) (alternative synthesis). Hydrogenolysis of (*R,R*)-**28** resulted in formation of (*R,R*)-c-NorEpi. (*R,R*)-c-Epi was prepared by lithium aluminum hydride promoted reduction and subsequent debenzoylation of (*R,R,R*)-**26** (enantiomeric excess >98%). Reagents and conditions: a) Boc<sub>2</sub>O, *N,N*-diisopropylethylamine, CH<sub>2</sub>Cl<sub>2</sub>, r.t., 18 h; b) recrystallization; c) (*R*)-methylbenzyl isocyanate, Bu<sub>2</sub>Sn dilaurate, CH<sub>2</sub>Cl<sub>2</sub>, r.t., 7 d; d) recrystallization; e) LiAlH<sub>4</sub>, THF, 90 °C, 1 h; f) H<sub>2</sub>, Pd/C, EtOH, r.t., 1 h; g) TBAF, THF, 90 °C, 3-6 h; h) acetone, NaBH(OAc)<sub>3</sub>, CH<sub>2</sub>Cl<sub>2</sub>, r.t., 4 h.

## Supplementary Tables

| compound      |                 | $\beta_1$ AR <sup>a</sup> |       | $\beta_2$ AR <sup>a</sup> |       | $\alpha_{1A}$ AR <sup>b</sup> |       | $\alpha_{1B}$ AR <sup>b</sup> |       | $\alpha_{2A}$ AR <sup>c</sup> |       | $\alpha_{2B}$ AR <sup>c</sup> |       | $\alpha_{2C}$ AR <sup>c</sup> |       |
|---------------|-----------------|---------------------------|-------|---------------------------|-------|-------------------------------|-------|-------------------------------|-------|-------------------------------|-------|-------------------------------|-------|-------------------------------|-------|
| 1             | stereochemistry | $K_i$ [nM $\pm$ S.E.M.]   | $n^d$ | $K_i$ [nM $\pm$ S.E.M.]   | $n^d$ | $K_i$ [nM $\pm$ S.E.M.]       | $n^d$ | $K_i$ [nM $\pm$ S.E.M.]       | $n^d$ | $K_i$ [nM $\pm$ S.E.M.]       | $n^d$ | $K_i$ [nM $\pm$ S.E.M.]       | $n^d$ | $K_i$ [nM $\pm$ S.E.M.]       | $n^d$ |
| 1             | (R,S)-cis       | >20000                    | 3     | >20000                    | 3     | >50,000                       | 3     | >50,000                       | 3     | 26,000 $\pm$ 2,100            | 3     | 11,000 $\pm$ 1,400            | 3     | 7,100 $\pm$ 2,600             | 3     |
| 2             | (S,R)-cis       | >20000                    | 3     | >20000                    | 3     | >50,000                       | 3     | >50,000                       | 3     | >50,000                       | 3     | >50,000                       | 3     | 14,000 $\pm$ 2,600            | 3     |
| 3             | (S,S)-trans     | >20000                    | 3     | >20000                    | 3     | >50,000                       | 3     | >50,000                       | 3     | >50,000                       | 3     | >50,000                       | 3     | 26,000 $\pm$ 1,500            | 3     |
| 4             | (R,R)-trans     | >20000                    | 3     | >20000                    | 3     | 18,000 $\pm$ 4,000            | 3     | 19,000 $\pm$ 2,600            | 3     | 4,800 $\pm$ 1,800             | 3     | 9,100 $\pm$ 2,500             | 3     | 1,900 $\pm$ 320               | 3     |
| 5             | (R,S)-cis       | >20000                    | 4     | 1,800 $\pm$ 660           | 4     | >50,000                       | 3     | >50,000                       | 3     | 29,000 $\pm$ 7,300            | 3     | 31,00 $\pm$ 4,600             | 3     | >50,000                       | 3     |
| 6             | (S,R)-cis       | >20000                    | 3     | 3,000 $\pm$ 410           | 3     | >50,000                       | 3     | >50,000                       | 3     | 15,000 $\pm$ 1,100            | 3     | 9,700 $\pm$ 2,000             | 3     | 33,000 $\pm$ 10,000           | 3     |
| 7             | (S,S)-trans     | >20000                    | 5     | 370 $\pm$ 44              | 6     | >50,000                       | 3     | >50,000                       | 3     | 15,000 $\pm$ 2,300            | 3     | 12,000 $\pm$ 1,900            | 3     | 44,000 $\pm$ 13,000           | 3     |
| 8<br>(=c-ISO) | (R,R)-trans     | 4,000 $\pm$ 1,300         | 14    | 27 $\pm$ 3.9              | 13    | >50,000                       | 3     | >50,000                       | 3     | 12,000 $\pm$ 2,400            | 3     | 20,000 $\pm$ 5,600            | 3     | 34,000 $\pm$ 7,500            | 3     |

**Supplementary Table 1 | Receptor binding data for different isomers of the conformationally restricted N-isoprenaline (1-8) at adrenergic receptor subtypes  $\beta_1$ AR,  $\beta_2$ AR,  $\alpha_{1A}$ AR,  $\alpha_{1B}$ AR,  $\alpha_{2A}$ AR,  $\alpha_{2B}$ AR, and  $\alpha_{2C}$ AR using membranes from HEK293T cells transfected with the appropriate receptor.** Binding assay performed with a radioligand displacement assay using the <sup>a</sup> radioligand [<sup>3</sup>H]CGP12,177, <sup>b</sup> radioligand [<sup>3</sup>H]prazosin and <sup>c</sup> radioligand [<sup>3</sup>H]RX821002. <sup>d</sup> Number of individual experiments each done in triplicates.

| receptor                                                          | c-Epi                              |                                   |                | c-NorEpi                           |                                   |                | c-ISO                              |                                   |                | Epi                                |                                   |                | NorEpi                             |                                   |                | ISO                                |                                   |                |
|-------------------------------------------------------------------|------------------------------------|-----------------------------------|----------------|------------------------------------|-----------------------------------|----------------|------------------------------------|-----------------------------------|----------------|------------------------------------|-----------------------------------|----------------|------------------------------------|-----------------------------------|----------------|------------------------------------|-----------------------------------|----------------|
|                                                                   | EC <sub>50</sub> [nM] <sup>a</sup> | E <sub>max</sub> [%] <sup>b</sup> | n <sup>c</sup> | EC <sub>50</sub> [nM] <sup>a</sup> | E <sub>max</sub> [%] <sup>b</sup> | n <sup>c</sup> | EC <sub>50</sub> [nM] <sup>a</sup> | E <sub>max</sub> [%] <sup>b</sup> | n <sup>c</sup> | EC <sub>50</sub> [nM] <sup>a</sup> | E <sub>max</sub> [%] <sup>b</sup> | n <sup>c</sup> | EC <sub>50</sub> [nM] <sup>a</sup> | E <sub>max</sub> [%] <sup>b</sup> | n <sup>c</sup> | EC <sub>50</sub> [nM] <sup>a</sup> | E <sub>max</sub> [%] <sup>b</sup> | n <sup>c</sup> |
|                                                                   | arrestin recruitment <sup>d</sup>  |                                   |                |                                    |                                   |                |                                    |                                   |                |                                    |                                   |                |                                    |                                   |                |                                    |                                   |                |
| β <sub>1</sub> AR_WT                                              | 15,000 ± 1,900                     | 57 ± 6                            | 15             | 12,000 ± 2,700                     | 58 ± 4                            | 13             | 1,500 ± 290                        | 100 ± 4                           | 14             | 360 ± 43                           | 98 ± 2                            | 6              | 150 ± 12                           | 100                               | 9              | 22 ± 5.5                           | 106 ± 2                           | 10             |
| β <sub>1</sub> AR_4 mut                                           | 1,200 ± 140                        | 93 ± 2                            | 7              | 780 ± 110                          | 100 ± 3                           | 5              | 60 ± 2.8                           | 93 ± 2                            | 5              | -                                  | -                                 | -              | 1400 ± 90                          | 100                               | 7              | -                                  | -                                 | -              |
| β <sub>1</sub> AR <sub>in</sub> /β <sub>2</sub> AR <sub>out</sub> | 220 ± 23                           | 98 ± 3 <sup>e</sup>               | 12             | 3600 ± 860                         | 106 ± 5 <sup>e</sup>              | 8              | 250 ± 39                           | 104 ± 3 <sup>e</sup>              | 8              | 4600 ± 780                         | 100 <sup>e</sup>                  | 15             | 28000 ± 15000                      | 43 ± 4 <sup>e</sup>               | 6              | 1600 ± 310                         | 103 ± 2 <sup>e</sup>              | 13             |
| β <sub>2</sub> AR_WT                                              | 24 ± 2.2                           | 112 ± 2                           | 21             | 130 ± 15                           | 111 ± 2                           | 13             | 19 ± 3.1                           | 109 ± 1                           | 21             | 180 ± 13                           | 110 ± 1                           | 17             | 8100 ± 580                         | 100                               | 9              | 67 ± 14                            | 105 ± 2                           | 12             |
| β <sub>2</sub> AR_4 mut                                           | 310 ± 28                           | 93 ± 4                            | 7              | 2,400 ± 460                        | 86 ± 5                            | 7              | 1,100 ± 370                        | 101 ± 3                           | 8              | -                                  | -                                 | -              | 490 ± 38                           | 100                               | 9              | -                                  | -                                 | -              |
| β <sub>2</sub> AR <sub>in</sub> /β <sub>1</sub> AR <sub>out</sub> | 8300 ± 840                         | 99 ± 7 <sup>e</sup>               | 11             | 7400 ± 2700                        | 87 ± 5 <sup>e</sup>               | 10             | 580 ± 110                          | 101 ± 3 <sup>e</sup>              | 10             | 80 ± 18                            | 100 <sup>e</sup>                  | 6              | 29 ± 3                             | 103 ± 1 <sup>e</sup>              | 8              | 5.3 ± 0.36                         | 112 ± 3 <sup>e</sup>              | 7              |
| α <sub>1A</sub> AR_WT                                             | 11,000 ± 7,600                     | 12 ± 2                            | 7              | 2,300 ± 1,500                      | 18 ± 5                            | 5              | na                                 | <5                                | 8              | -                                  | -                                 | -              | 620 ± 67                           | 100                               | 13             | -                                  | -                                 | -              |
| α <sub>1B</sub> AR_WT                                             | 8,400 ± 3,000                      | 11 ± 2                            | 4              | 7,500 ± 760                        | 19 ± 2                            | 4              | na                                 | <5                                | 4              | -                                  | -                                 | -              | 83 ± 17                            | 100                               | 5              | -                                  | -                                 | -              |
| α <sub>2A</sub> AR_WT                                             | na                                 | <5                                | 8              | na                                 | <5                                | 5              | na                                 | <5                                | 8              | -                                  | -                                 | -              | 620 ± 67                           | 100                               | 13             | -                                  | -                                 | -              |
| α <sub>2B</sub> AR_WT                                             | na                                 | <5                                | 4              | na                                 | <27 (100μM) <sup>f</sup>          | 4              | na                                 | <5                                | 4              | -                                  | -                                 | -              | 150 ± 27                           | 100                               | 11             | -                                  | -                                 | -              |
| α <sub>2C</sub> AR_WT                                             | na                                 | <18 (100μM) <sup>f</sup>          | 4              | 20,000 ± 1,100                     | 33 ± 2                            | 4              | na                                 | <13 (100μM) <sup>f</sup>          | 4              | -                                  | -                                 | -              | 110 ± 50                           | 100                               | 5              | -                                  | -                                 | -              |
|                                                                   | G-protein signaling <sup>g</sup>   |                                   |                |                                    |                                   |                |                                    |                                   |                |                                    |                                   |                |                                    |                                   |                |                                    |                                   |                |
| β <sub>1</sub> AR_WT + Gα <sub>qs</sub>                           | 5,900 ± 890                        | 75 ± 3                            | 4              | -                                  | -                                 | -              | -                                  | -                                 | 240 ± 40       | 97 ± 1                             | 6                                 | 110 ± 16       | 100                                | 9                                 | 27 ± 5         | 99 ± 2                             | 6                                 |                |
| β <sub>2</sub> AR_WT + Gα <sub>qs</sub>                           | 23 ± 4.8                           | 109 ± 2                           | 7              | -                                  | -                                 | -              | -                                  | -                                 | 180 ± 54       | 108 ± 3                            | 7                                 | 1900 ± 290     | 100                                | 14                                | 43 ± 10        | 107 ± 3                            | 7                                 |                |

**Supplementary Table 2 | Functional data for the restricted agonists c-Epi, c-NorEpi, c-ISO, and Epi and NorEpi in arrestin recruitment for the adrenergic receptors α<sub>1A</sub>AR, α<sub>1B</sub>AR, α<sub>2A</sub>AR, α<sub>2B</sub>AR, β<sub>1</sub>AR and β<sub>2</sub>AR, as well as the β<sub>1</sub>AR<sub>in</sub>/β<sub>2</sub>AR<sub>out</sub> and β<sub>2</sub>AR<sub>in</sub>/β<sub>1</sub>AR<sub>out</sub> chimeras and the β<sub>1</sub>AR\_4mut and β<sub>2</sub>AR\_4mut mutants.** <sup>a</sup> Potency displayed as mean EC<sub>50</sub> value in nM ± SEM. <sup>b</sup> Maximum effect in % ± SEM relative to the effect of the reference agonist norepinephrine. <sup>c</sup> Number of individual experiments each done in duplicates. <sup>d</sup> Determined with a fragment complementation based assay (PathHunter<sup>®</sup>) applying the appropriate receptor fused to the PK1 fragment or the ARMS2-PK2 fragment for enzyme complementation in HEK cells stably expressing the enzyme acceptor (EA) tagged β-arrestin-2 fusion protein. <sup>e</sup> Maximum effect in % ± SEM relative to the effect of Epi. <sup>f</sup> No complete dose-response curve; maximum efficacy at the indicated concentration (in brackets). <sup>g</sup> Measurement of G-protein signaling by applying a homologous TR-FRET assay for IP detection (IP-One<sup>®</sup>) after co-transfection of the appropriate receptor and the hybrid G-protein Gα<sub>qs</sub> in HEK293T cells. na: No EC<sub>50</sub> value could be calculated.

**a**

| Cyclase                      |                                       | Epi        | c-Epi      | Fold<br>c-Epi/<br>Epi | NorEpi     | c-NorEpi   | Fold<br>c-NorEpi/<br>NorEpi | ISO        | c-ISO      | Fold<br>c-ISO/<br>ISO |
|------------------------------|---------------------------------------|------------|------------|-----------------------|------------|------------|-----------------------------|------------|------------|-----------------------|
| Log(EC <sub>50</sub> ),<br>M | β <sub>1</sub> AR                     | -8.2 ± 0.2 | -7.1 ± 0.1 | ~14x***               | -8.9 ± 0.2 | -6.9 ± 0.2 | ~92x***                     | -8.4 ± 0.1 | -7.9 ± 0.1 | 2.7x***               |
|                              | β <sub>2</sub> AR                     | -8.2 ± 0.2 | -8.7 ± 0.1 | ~0.3x*                | -7.0 ± 0.2 | -8.8 ± 0.2 | ~0.02x***                   | -8.8 ± 0.1 | -8.4 ± 0.1 | NS                    |
|                              | Selectivity over<br>β <sub>1</sub> AR | NS         | 47x***     |                       | 0.002x***  | 20x***     |                             | 2.5x*      | 2.9x*      |                       |
| Emax<br>(x10 <sup>-3</sup> ) | β <sub>1</sub> AR                     | 9.3 ± 0.5  | 8.3 ± 0.4  | ~0.9x*                | 9.9 ± 0.5  | 7.8 ± 0.3  | ~0.8x***                    | 11 ± 0.4   | 11 ± 0.5   | NS                    |
|                              | β <sub>2</sub> AR                     | 7.7 ± 0.4  | 8.0 ± 0.4  | NS                    | 8.3 ± 0.5  | 7.7 ± 0.7  | NS                          | 8.2 ± 0.3  | 9.7 ± 0.4  | ~1.2x**               |
|                              | β <sub>2</sub> AR/β <sub>1</sub> AR   | 0.8x*      | NS         |                       | 0.8x***    | NS         |                             | 0.8x***    | 0.9x*      |                       |

  

**b**

| Arrestin<br>Recruitment      |                                       | Epi        | c-Epi      | Fold<br>c-Epi/<br>Epi | NorEpi     | c-NorEpi   | Fold<br>c-NorEpi/<br>NorEpi | ISO        | c-ISO      | Fold<br>c-ISO/<br>ISO |
|------------------------------|---------------------------------------|------------|------------|-----------------------|------------|------------|-----------------------------|------------|------------|-----------------------|
| Log(EC <sub>50</sub> ),<br>M | β <sub>1</sub> AR                     | -6.2 ± 0.1 | -4.9 ± 0.2 | 19x**                 | -6.5 ± 0.1 | -5.1 ± 0.1 | 25x***                      | -7.8 ± 0.1 | -5.7 ± 0.1 | 107x***               |
|                              | β <sub>2</sub> AR                     | -6.4 ± 0.1 | -7.7 ± 0.1 | 0.05x***              | -5.2 ± 0.1 | -6.8 ± 0.1 | 0.03x***                    | -7.7 ± 0.1 | -7.6 ± 0.1 | NS                    |
|                              | Selectivity over<br>β <sub>1</sub> AR | 1.4x*      | 594x***    |                       | 0.06x***   | 52x*       |                             | NS         | 73x***     |                       |
| Emax<br>(AU)                 | β <sub>1</sub> AR                     | 101 ± 2    | 53 ± 3     | 0.5x**                | 102 ± 2    | 54 ± 2     | 0.53x***                    | 93 ± 1     | 96 ± 2     | NS                    |
|                              | β <sub>2</sub> AR                     | 112 ± 2    | 120 ± 3    | 1.1x*                 | 102 ± 2    | 115 ± 2    | 1.1x**                      | 108 ± 2    | 84 ± 3     | 0.8x***               |
|                              | β <sub>2</sub> AR/β <sub>1</sub> AR   | 1.1x**     | 2.3x**     |                       | NS         | 2.1x***    |                             | 0.9x***    | 1.1x**     |                       |

**Supplementary Table 3 | Adenylyl cyclase activation and arrestin recruitment by non-constrained and constrained catecholamines .** Summary of the dose-response relationship of catecholamine-stimulated cAMP accumulation (a) and β-arrestin recruitment assay (b) on β<sub>1</sub>AR or β<sub>2</sub>AR. Log(EC<sub>50</sub>)s and maximal activities were determined to a single site logistics curve using Prism (GraphPad, La Jolla, CA). Data are representative of n=3-6 individual experiments. Statistics represent paired comparisons of either non-constrained vs constrained catecholamines on either β<sub>1</sub>AR or β<sub>2</sub>AR (relative to non-constrained), or, β<sub>1</sub>AR vs β<sub>2</sub>AR stimulated by either non-constrained or constrained catecholamines (relative to β<sub>2</sub>AR). P values were determined using the Extra Sum of Squares F test (GraphPad Prism 9, CA) and are indicated for the Log (EC<sub>50</sub>) and Vmax values (\*p<0.05, \*\* p<0.001, \*\*\*p<0.0001, NS not statistically different).

|                                                                 |                     | Epi        | c-Epi      | Ki(c-Epi)/<br>Ki(Epi) | NorEpi     | c-NorEpi   | Ki(c-NorEpi)/<br>Ki(NorEpi) | ISO        | c-ISO      | Ki(c-ISO)/<br>Ki(ISO) |
|-----------------------------------------------------------------|---------------------|------------|------------|-----------------------|------------|------------|-----------------------------|------------|------------|-----------------------|
| $\beta_1$ AR                                                    | wt                  | -6.4 ± 0.1 | -4.9 ± 0.1 | 33.7***               | -6.7 ± 0.1 | -5.0 ± 0.1 | 51.1***                     | -7.5 ± 0.1 | -6.5 ± 0.1 | 9.8***                |
|                                                                 | 4mut                | -6.0 ± 0.1 | -5.5 ± 0.1 | 2.9**                 | -5.6 ± 0.1 | -4.8 ± 0.1 | 5.8***                      | -7.2 ± 0.1 | -7.1 ± 0.1 | 1.3*                  |
|                                                                 | Ki(4mut)/<br>Ki(wt) | 2.8***     | 0.2***     |                       | 12.7***    | 1.4**      |                             | 2.0***     | 0.3**      |                       |
| $\beta_2$ AR                                                    | wt                  | -7.0 ± 0.1 | -7.9 ± 0.1 | 0.1***                | -5.8 ± 0.1 | -6.2 ± 0.1 | 0.4***                      | -7.6 ± 0.1 | -8.1 ± 0.1 | 0.3***                |
|                                                                 | 4mut                | -7.4 ± 0.1 | -6.9 ± 0.1 | 3.2***                | -6.5 ± 0.1 | -5.5 ± 0.1 | 10.7***                     | -7.7 ± 0.1 | -7.4 ± 0.1 | 2.1*                  |
|                                                                 | Ki(4mut)/<br>Ki(wt) | 0.3***     | 8.8***     |                       | 0.2***     | 5.2***     |                             | 0.8**      | 5.4***     |                       |
| Fold selectivity of $\beta_2$ AR-wt<br>over $\beta_1$ AR-wt     |                     | 3.3*       | 891.3***   |                       | 0.1***     | 15.6***    |                             | NS         | 43.9***    |                       |
| Fold selectivity of $\beta_2$ AR-4mut<br>over $\beta_1$ AR-4mut |                     | 26.8***    | 24.5***    |                       | 8.0***     | 4.3***     |                             | 3.5**      | 4.6***     |                       |

**Supplementary Table 4 | Inhibition of [<sup>3</sup>H]DHA binding by non-constrained and constrained catecholamines .** Summary of the competition of [<sup>3</sup>H]DHA by non-constrained and constrained catecholamines in membranes prepared from *Sf9* cells infected with baculoviruses. Ki values were determined using the IC<sub>50</sub> values determined by a single site logistics curve using Prism and adjusted for K<sub>d</sub> values for [<sup>3</sup>H]DHA for  $\beta_1$ AR and  $\beta_2$ AR (and mutants thereof) and the concentration used in the assay, according to Cheng-Prusoff equation (GraphPad, La Jolla, CA). Data are representative of n=3-6 individual experiments. Statistics represent paired comparisons of either non-constrained vs constrained catecholamines on either  $\beta_1$ AR,  $\beta_2$ AR (shaded) or comparisons with the corresponding vestibule mutants (4mut) (relative to non-constrained). Additional comparison of  $\beta$ AR(WT) vs  $\beta$ AR(4mut) of either  $\beta_1$ AR or  $\beta_2$ AR, by either non-constrained or constrained catecholamines are also included. P values were determined using the Extra Sum of Squares F test (GraphPad Prism 9, CA) and are indicated for the Log (K<sub>i</sub>) (\*p<0.05, \*\* p<0.001, \*\*\* p<0.0001, or NS not statistically different).

| $\beta_1AR$                      | $K_{on}$ ( $M^{-1}min^{-1}$ ) | n | $K_{off}$ ( $min^{-1}$ )     | n | $K_{off}/K_{on}$ (nM)     | n |
|----------------------------------|-------------------------------|---|------------------------------|---|---------------------------|---|
| NorEpi*                          | $2.0 \pm 0.1 \times 10^5$     | 7 | $6.4 \pm 1.2 \times 10^{-2}$ | 7 | $3.1 \pm 0.5 \times 10^2$ | 7 |
| c-NorEpi                         | $1.3 \pm 0.3 \times 10^4$     | 5 | $1.7 \pm 0.4 \times 10^{-1}$ | 5 | $1.3 \pm 0.1 \times 10^4$ | 5 |
| Epi*                             | $6.2 \pm 0.6 \times 10^4$     | 5 | $5.1 \pm 0.9 \times 10^{-2}$ | 5 | $8.2 \pm 1 \times 10^2$   | 5 |
| c-Epi                            | $1.1 \pm 0.1 \times 10^4$     | 5 | $1.3 \pm 0.4 \times 10^{-1}$ | 5 | $1.1 \pm 0.2 \times 10^4$ | 5 |
| $\beta_2AR$                      | $K_{on}$ ( $M^{-1}min^{-1}$ ) | n | $K_{off}$ ( $min^{-1}$ )     | n | $K_{off}/K_{on}$ (nM)     | n |
| NorEpi*                          | $8.5 \pm 1.5 \times 10^3$     | 4 | $4.1 \pm 1.2 \times 10^{-2}$ | 4 | $4.7 \pm 0.6 \times 10^3$ | 4 |
| c-NorEpi                         | $1.7 \pm 0.2 \times 10^4$     | 4 | $1.9 \pm 0.1 \times 10^{-2}$ | 4 | $1.2 \pm 0.2 \times 10^3$ | 4 |
| Epi*                             | $1.2 \pm 0.2 \times 10^5$     | 7 | $4.7 \pm 1.1 \times 10^{-2}$ | 7 | $3.8 \pm 0.6 \times 10^2$ | 7 |
| c-Epi                            | $3.6 \pm 0.8 \times 10^5$     | 8 | $4.1 \pm 0.6 \times 10^{-2}$ | 8 | $1.3 \pm 0.2 \times 10^2$ | 8 |
| $\beta_1AR_{in}/\beta_2AR_{out}$ | $K_{on}$ ( $M^{-1}min^{-1}$ ) | n | $K_{off}$ ( $min^{-1}$ )     | n | $K_{off}/K_{on}$ (nM)     | n |
| NorEpi*                          | $6.7 \pm 0.8 \times 10^3$     | 3 | $1.0 \pm 0.1 \times 10^{-1}$ | 3 | $1.4 \pm 0.2 \times 10^4$ | 3 |
| c-NorEpi                         | $1.9 \pm 0.1 \times 10^4$     | 3 | $1.2 \pm 0.5 \times 10^{-1}$ | 3 | $4.3 \pm 1.1 \times 10^3$ | 3 |
| Epi*                             | $6.3 \pm 1.1 \times 10^4$     | 4 | $2.5 \pm 0.4 \times 10^{-1}$ | 4 | $4.1 \pm 0.5 \times 10^3$ | 4 |
| c-Epi                            | $8.7 \pm 3.5 \times 10^4$     | 4 | $1.7 \pm 0.6 \times 10^{-1}$ | 4 | $2.2 \pm 0.5 \times 10^3$ | 4 |
| $\beta_2AR_{in}/\beta_1AR_{out}$ | $K_{on}$ ( $M^{-1}min^{-1}$ ) | n | $K_{off}$ ( $min^{-1}$ )     | n | $K_{off}/K_{on}$ (nM)     | n |
| NorEpi*                          | $4.9 \pm 1.3 \times 10^5$     | 8 | $9.4 \pm 2.1 \times 10^{-2}$ | 8 | $2.5 \pm 0.5 \times 10^2$ | 8 |
| c-NorEpi                         | $3.2 \pm 0.9 \times 10^4$     | 5 | $2.2 \pm 0.7 \times 10^{-1}$ | 5 | $7.1 \pm 1.1 \times 10^3$ | 5 |
| Epi*                             | $1.3 \pm 0.3 \times 10^5$     | 4 | $3.8 \pm 1.2 \times 10^{-2}$ | 4 | $2.8 \pm 0.5 \times 10^2$ | 4 |
| c-Epi                            | $1.3 \pm 0.4 \times 10^4$     | 4 | $8.7 \pm 4.4 \times 10^{-2}$ | 4 | $5.5 \pm 1.9 \times 10^3$ | 4 |

**Supplementary Table 5 | The binding kinetics of non-constrained and constrained NorEpi or Epi to the  $\beta_1AR$ ,  $\beta_2AR$  as well as the  $\beta_1AR_{in}/\beta_2AR_{out}$  and  $\beta_2AR_{in}/\beta_1AR_{out}$  chimeras. \*** The parameters of NorEpi and Epi are derived from a previous publication of our group<sup>1</sup>.



**a**

| Log( $\tau/Ka$ )              |              | Epi        | c-Epi         | NorEpi     | c-NorEpi      | ISO        | c-ISO      |
|-------------------------------|--------------|------------|---------------|------------|---------------|------------|------------|
| cAMP accumulation             | $\beta_1$ AR | 8.4 ± 0.2  | 7.0 ± 0.2***  | 9.8 ± 0.6  | 6.4 ± 0.4***  | 8.3 ± 0.2  | 8.1 ± 0.2  |
|                               | $\beta_2$ AR | 8.0 ± 0.2  | 8.6 ± 0.2*    | 6.5 ± 0.5  | 7.8 ± 0.4**   | 8.0 ± 0.2  | 8.2 ± 0.2  |
| $\beta$ -arrestin recruitment | $\beta_1$ AR | 6.2 ± 0.05 | 4.9 ± 0.01*   | 6.9 ± 0.05 | 5.2 ± 0.09*** | 7.8 ± 0.05 | 5.6 ± 0.08 |
|                               | $\beta_2$ AR | 6.4 ± 0.02 | 7.7 ± 0.03*** | 5.0 ± 0.04 | 6.9 ± 0.02*** | 7.7 ± 0.05 | 7.6 ± 0.04 |

**b**

|                                 |                           | c-Epi vs Epi |              | c-NorEpi vs NorEpi |              | c-ISO vs ISO |              |
|---------------------------------|---------------------------|--------------|--------------|--------------------|--------------|--------------|--------------|
|                                 |                           | $\beta_2$ AR | $\beta_1$ AR | $\beta_2$ AR       | $\beta_1$ AR | $\beta_2$ AR | $\beta_1$ AR |
| cAMP accumulation               | $\Delta$ Log( $\tau/Ka$ ) | 0.6 ± 0.2    | -1.4 ± 0.2   | 1.3 ± 0.6          | -3.4 ± 0.7   | 0.2 ± 0.3    | -0.7 ± 0.2   |
|                                 | Relative Effectiveness    | 3.84         | 0.04         | 20.23              | 0.00         | 1.56         | 0.57         |
| $\beta$ -arrestin recruitment   | $\Delta$ Log( $\tau/Ka$ ) | 1.3 ± 0.03   | -1.3 ± 0.1   | 1.8 ± 0.0          | -1.7 ± 0.1   | -0.06 ± 0.06 | -2.1 ± 0.1   |
|                                 | Relative Effectiveness    | 20.84        | 0.05         | 65.01              | 0.02         | 0.86         | 0.01         |
| $\Delta\Delta$ Log( $\tau/Ka$ ) |                           | 0.7 ± 0.2    | 0.1 ± 0.3    | 0.5 ± 0.6          | 1.7 ± 0.7    | -0.3 ± 0.3   | -1.9 ± 0.3   |
| Bias Factor                     |                           | 5.43         | 1.20         | 3.21               | 51.17        | 0.55         | 0.01         |

**Supplementary Table 6 | Relative effectiveness and Bias of constrained catecholamines on  $\beta_1$ AR vs  $\beta_2$ AR on cAMP accumulation and  $\beta_2$ -arrestin recruitment.** **a.** Log( $\tau/Ka$ ) values for non- and constrained-catecholamines in cAMP and  $\beta$ -arrestin recruitment assays. (\* $p < 0.05$ , \*\*  $p < 0.001$ , or \*\*\*  $p < 0.0001$ ). P values were determined using the Extra Sum of Squares F test (GraphPad Prism 9, CA). **b.** Bias factors of constrained catecholamines in cAMP and  $\beta$ -arrestin recruitment assays. The  $\Delta$ Log( $\tau/Ka$ ), relative effectiveness and  $\Delta\Delta$ Log( $\tau/Ka$ ) values were determined from Log( $\tau/Ka$ ) values for each ligand using the Operational Model for Bias<sup>2</sup> (using GraphPad Prism 9, CA) from cAMP accumulation and  $\beta$ -arrestin recruitment data described in Figure 2 and Supplementary Figure 1.

|                                                      | T4L-β2AR/ Nb6B9/ cEpi | T4L-β2AR/ Nb6B9/ cISO |
|------------------------------------------------------|-----------------------|-----------------------|
| <b>Data collection</b>                               |                       |                       |
| Space group                                          | P 21 21 21            | P 21 21 21            |
| Cell dimensions                                      |                       |                       |
| <i>a, b, c</i> (Å)                                   | 49.6, 66.56, 302.72   | 49.6, 66.56, 302.72   |
| <i>a, b, c</i> (°)                                   | 90, 90, 90            | 90, 90, 90            |
| Resolution (Å)                                       | 50 – 3.1 (3.2 -3.1)   | 50 – 3.4 (3.5-3.4)    |
| <i>R</i> <sub>sym</sub> or <i>R</i> <sub>merge</sub> | 0.36 (1.37)           | 0.43 (1.30)           |
| <i>I</i> / <i>σI</i>                                 | 6.73 (1.10)           | 6.76□ 1.18□           |
| Completeness (%)                                     | 99.5 (97.2)           | 99.5 (97.4)           |
| Redundancy                                           | 11.38 (5.32)          | 12.7□ 5.55□           |
| <b>Refinement</b>                                    |                       |                       |
| Resolution (Å)                                       | 20-3.1                | 20-3.4                |
| No. reflections (test set)                           | 18885 (1858)          | 14444(1445)           |
| <i>R</i> <sub>work</sub> / <i>R</i> <sub>free</sub>  | 0.23 /0.27            | 0.23/0.26             |
| No. atoms                                            |                       |                       |
| Protein                                              | 4507                  | 4507                  |
| Ligand                                               | 16                    | 18                    |
| Others (Lipids, ions, water)                         | 2                     | 1                     |
| <i>B</i> -factors                                    |                       |                       |
| Receptor                                             | 58.77                 | 55.99                 |
| T4L                                                  | 64.64                 | 64.93                 |
| Nb 6B9                                               | 68.68                 | 66.05                 |
| Ligand                                               | 50.08                 | 55.58                 |
| Others (Lipids, ions, water)                         | 44.61                 | 47.77                 |
| R.m.s. deviations                                    |                       |                       |
| Bond lengths (Å)                                     | 0.003                 | 0.003                 |
| Bond angles (°)                                      | 0.54                  | 0.52                  |
| Ramachandran favored (%)                             | 97.18                 | 97.18                 |
| Ramachandran allowed (%)                             | 2.82                  | 2.82                  |
| Ramachandran outliers (%)                            | 0.00                  | 0.00                  |

\*Values in parentheses are for highest-resolution shell.

## Supplementary Table 7 | Data collection and refinement statistics.

## Supplementary Notes

### Chemical Synthesis (see also Supplementary Fig 16-19)

*General:* All chemicals and solvents were purchased from Sigma Aldrich, Acros Organics, Alfa Aesar, or Activate Scientific and were used without additional purification. (*R*)-(+)- $\alpha$ -methylbenzyl isocyanate was bought from TCI (*ee* > 98%) and used as soon as possible after delivery. Anhydrous solvents were of the highest commercially available grade and were stored over molecular sieves under a nitrogen atmosphere. Flash chromatography was performed on Merck silica gel 60 (40-63  $\mu$ m) as stationary phase under positive pressure of dry nitrogen gas. Automated flash column chromatography was performed with a Biotage SP1 Flash Chromatography Purification System using either Biotage® SNAP KP-Sil or Biotage® SNAP KP-C18-HS columns (10 g or 50 g loading). Preparative RP-HPLC was performed on an Agilent 1100 Preparative Series, using a ZORBAX ECLIPSE XDB-C8 PrepHT (21.5 x 150 mm, 5  $\mu$ m, flow rate 8-12 mL/min) column with the solvent systems indicated. Analytical RP-HPLC was conducted on an Agilent 1200 HPLC system employing a DAD detector and a ZORBAX ECLIPSE XDB-C8 (4.6 x 150 mm, 5  $\mu$ m) column with the following binary solvent systems: System 1: eluent, acetonitrile/0.1% aq. TFA, 4% acetonitrile at 0 min, to 25% at 24 min, 40% at 26 min, 40% until 28 min, 95% at 30 min, 95% until 32 min, 4% at 34 min, 4% until 37 min. Flow rate 0.5 mL/min,  $\lambda$  = 254 or 280 nm; System 2: eluent, methanol/0.1% aq. TFA, 5% methanol at 0 min, to 30% at 24 min, 50% at 26 min, 50% until 28 min, 95% at 30 min, 95% until 32 min, 5% at 34 min, 5% until 37 min. Flow rate 0.5 mL/min,  $\lambda$  = 254 or 280 nm. Preparative chiral HPLC was performed on an Agilent 1100 HPLC systems employing a VWL detector using a Daicel semi-preparative CHIRALPAK® IC column (10 x 250 mm, 5  $\mu$ m particle size, flow rate 5-7 mL/min). Analytical chiral HPLC was performed on an Agilent series 1200 system using a DAD and a Daicel CHIRALPAK® IC column (4.6 x 250 mm, 5  $\mu$ m particle size) with CHIRALPAK® IC guard cartridge (4 x 10 mm, 5  $\mu$ m particle size) with following isocratic conditions: *n*-hexane/isopropanol + 0.1% ethylenediamine 9:1, 0.7 mL/min flowrate, 20 °C column temperature (system Ch1). Optical

rotation was measured with a JASCO C-2000 polarimeter (cylindrical glass cuvette with a path of 100 mm and a volume of 1 mL). Melting points were determined using a MEL-TEMP II apparatus (Laboratory Devices, U.S.) and are uncorrected. TLC analyses were conducted using Merck 60 F254 aluminum plates in combination with UV detection (254 nm) or staining reagents. HR-MS was run on a AB Sciex Triple TOF660 Sciex, source type ESI, or on a Bruker maXis MS in the laboratory of the Chair of Organic Chemistry, FAU, or on a Bruker maXis MS in the laboratory of the Chair of Bioinorganic Chemistry, FAU. Mass detection was conducted with a Bruker Esquire 2000 ion trap mass spectrometer using APCI or ESI ionization source or with Bruker amaZon SL mass spectrometer in combination with a Agilent 1100 or Dionex Ultimate 3000 UHPLC system; respectively  $^1\text{H}$ , and  $^{13}\text{C}$  spectra were recorded on a Bruker Avance 360, Avance 400 or a Bruker Avance 600 FT-NMR spectrometer. Chemical shifts were calculated as ppm relative to TMS or solvent signal as internal standards.

*6,7-Bis(benzyloxy)-3,4-dihydronaphthalen-1(2H)-one* (**9**)

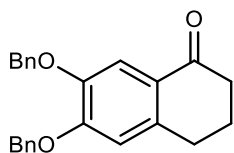

6,7-Dimethoxy-1-tetralone (2.18 g, 10.6 mmol) was dissolved in toluene (60 mL), and nitrogen was bubbled through the solution for 15 min. Anhydrous  $\text{AlCl}_3$  (7.05 g, 52.9 mmol) was added, and the solution was heated to reflux. After 1 h, stirring was continued at r.t.. After 16 h, the reaction was cooled on ice, and water (20 mL) and 2 M HCl (20 mL) were added. After 15 min, the precipitate was collected by filtration and washed with water. The solid was dissolved in MeOH (30 mL) and filtered through a sintered filter. The filtrate was evaporated to dryness, and the remaining solid was dissolved in acetone (60 mL). To the solution was added benzyl bromide (3.02 mL, 25.4 mmol), potassium carbonate (5.86 g, 42.4 mmol) and sodium iodide (254 mg, 1.69 mmol), and the reaction was heated to reflux for 16 h. The solid was removed by filtration through sinter and washed with acetone (40 mL). The

filtrate was evaporated to dryness and the resulting product was purified by recrystallization from *n*-hexane/CH<sub>2</sub>Cl<sub>2</sub> to give **9** as pale yellow needles (2.02 g, 53%).

<sup>1</sup>H NMR (600 MHz, CDCl<sub>3</sub>): δ 7.64 (s, 1H), 7.50 – 7.43 (m, 4H), 7.41 – 7.29 (m, 6H), 6.74 (s, 1H), 5.22 (s, 2H), 5.19 (s, 2H), 2.85 (t, *J* = 6.1 Hz, 2H), 2.61 – 2.55 (m, 2H), 2.14 – 2.06 (m, 2H); <sup>13</sup>C NMR (151 MHz, CDCl<sub>3</sub>): δ 197.3, 153.5, 147.7, 139.7, 137.1, 136.6, 128.7, 128.6, 128.1, 128.0, 127.5, 127.2, 126.4, 113.0, 111.8, 71.1, 70.9, 38.7, 29.6, 23.7.

**6,7-Bis(benzyloxy)-2,2-dibromo-3,4-dihydronaphthalen-1(2H)-one (10)**

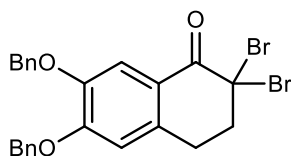

Compound **9** (2.00 g, 5.58 mmol) was dissolved in Et<sub>2</sub>O (30 mL) and CH<sub>2</sub>Cl<sub>2</sub> (30 mL). To the stirred solution was dropwise added a solution of bromine (572 μL, 11.2 mmol) in Et<sub>2</sub>O (30 mL) at r.t. After 5 min, 50% NaHCO<sub>3</sub> solution (20 mL) was slowly added, and the product was extracted with CH<sub>2</sub>Cl<sub>2</sub> (2 × 30 mL). The combined organic layers were washed with Na<sub>2</sub>S<sub>2</sub>O<sub>3</sub> (10% aq. solution, 30 mL), brine, dried (Na<sub>2</sub>SO<sub>4</sub>) and evaporated. The residue was purified by recrystallization (*n*-hexane/CH<sub>2</sub>Cl<sub>2</sub>) to give **10** as white needles (2.26 g, 93%).

<sup>1</sup>H NMR (360 MHz, CDCl<sub>3</sub>): δ 7.71 (s, 1H), 7.50 – 7.28 (m, 10H), 6.71 (s, 1H), 5.23 (s, 2H), 5.19 (s, 2H), 3.07 – 3.00 (m, 2H), 3.00 – 2.94 (m, 2H); <sup>13</sup>C NMR (91 MHz, CDCl<sub>3</sub>): δ 183.4, 154.6, 148.6, 137.6, 136.7, 136.2, 128.8, 128.7, 128.3, 128.2, 127.5, 127.2, 120.5, 113.8, 112.4, 77.4, 71.2, 71.0, 67.5, 53.6, 46.5, 31.7, 29.3, 22.8, 14.3.

**6,7-Bis(benzyloxy)-2-bromo-3,4-dihydronaphthalen-1(2H)-one (11)**

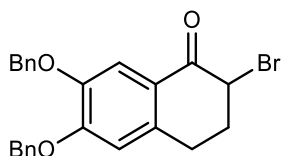

Compound **10** (2.70 g, 5.23 mmol) was dissolved in dry THF (20 mL) and cooled on ice. To the solution was dropwise added a solution of diethyl phosphite (743 μL, 5.75 mmol) and triethylamine (802 μL, 5.75 mmol) in THF (10 mL). After 3 d, water (30 mL) was added, and the product was extracted with EtOAc (3 × 40 mL). The combined organic layers were

washed with brine, dried ( $\text{Na}_2\text{SO}_4$ ), evaporated, and the product was purified by recrystallization (*n*-hexane/ $\text{CH}_2\text{Cl}_2$ ) to give **11** as pale orange needles (1.51 g, 66%).

$^1\text{H}$  NMR (360 MHz,  $\text{CDCl}_3$ ):  $\delta$  7.66 (s, 1H), 7.49 – 7.27 (m, 10H), 6.75 (s, 1H), 5.23 (s, 2H), 5.18 (s, 2H), 4.67 (t,  $J = 4.2$  Hz, 1H), 3.21 (ddd,  $J = 16.4, 9.8, 4.9$  Hz, 1H), 2.77 (dt,  $J = 16.9, 4.3$  Hz, 1H), 2.53 – 2.36 (m, 2H);  $^{13}\text{C}$  NMR (91 MHz,  $\text{CDCl}_3$ ):  $\delta$  189.4, 154.1, 148.0, 138.2, 136.6, 136.2, 128.6, 128.5, 128.0, 127.9, 127.3, 127.0, 123.2, 112.4, 112.4, 70.9, 70.7, 50.2, 32.2, 25.8.

### 2-Azido-6,7-bis(benzyloxy)-3,4-dihydronaphthalen-1(2H)-one (**12**)

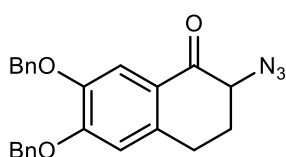

Compound **11** (1.78 g, 4.07 mmol) was dissolved in dry DMF (30 mL). Glacial acetic acid (279  $\mu\text{L}$ , 4.88 mmol) was added, followed by sodium azide (529 mg, 8.14 mmol) in water (2 mL) at r.t. After 1 h, water (50 mL) was added, followed by  $\text{CH}_2\text{Cl}_2$  (40 mL) and the product was extracted with further  $\text{CH}_2\text{Cl}_2$  (2  $\times$  30 mL). The combined organic layers were washed with brine, dried ( $\text{Na}_2\text{SO}_4$ ) and concentrated in vacuo. The residue was dissolved in  $\text{Et}_2\text{O}$  (30 mL) and washed with water (3  $\times$  50 mL), brine, dried ( $\text{MgSO}_4$ ) and evaporated to dryness, to give **12** as a solid (1.46 g, 90%) which was used as a crude material for the next step.

$^1\text{H}$  NMR (360 MHz,  $\text{CDCl}_3$ ):  $\delta$  7.63 (s, 1H), 7.50 – 7.29 (m, 10H), 6.71 (s, 1H), 5.22 (s, 2H), 5.19 (s, 2H), 4.15 (dd,  $J = 11.7, 4.7$  Hz, 1H), 2.93 (dd,  $J = 7.7, 4.7$  Hz, 2H), 2.36 – 2.23 (m, 1H), 2.14 – 2.02 (m, 1H);  $^{13}\text{C}$  NMR (91 MHz,  $\text{CDCl}_3$ )  $\delta$  192.6, 154.2, 148.1, 138.7, 136.8, 136.3, 128.8, 128.7, 128.3, 128.1, 127.5, 127.2, 124.6, 112.6, 112.0, 71.1, 70.9, 64.0, 29.7, 27.4.

### 2-Amino-6,7-bis(benzyloxy)-1,2,3,4-tetrahydronaphthalen-1-ol (**13**)

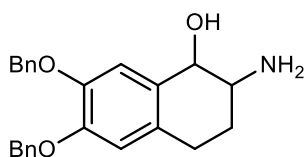

Compound **12** (440 mg, 1.10 mmol) was dissolved in 1,2-DCE (20 mL), and to the solution was dropwise added LiAlH<sub>4</sub> 1 M in THF (4.41 mL, 4.41 mmol, 4 eq.). After 16 h, water (5 mL) was added dropwise. The mixture was diluted with CH<sub>2</sub>Cl<sub>2</sub> (20 mL), and extracted twice with CH<sub>2</sub>Cl<sub>2</sub> (2 × 20 mL). The combined organic layers were washed with brine, dried (Na<sub>2</sub>SO<sub>4</sub>) and evaporated to give **13** required no further purification (325 mg, 76%, *cis/trans* approx. 1:1).

*cis*: <sup>1</sup>H NMR (600 MHz, CDCl<sub>3</sub>): δ 7.47 – 7.43 (m, 4H), 7.39 – 7.33 (m, 4H), 7.33 – 7.29 (m, 2H), 7.04 (s, 1H), 6.68 (s, 1H), 5.19 – 5.11 (m, 4H), 4.44 (d, *J* = 3.7 Hz, 1H), 3.12 (m, 1H), 2.77 (dt, *J* = 16.8, 5.1 Hz, 1H), 2.70 (ddd, *J* = 16.5, 9.8, 6.0 Hz, 1H), 1.92 – 1.83 (m, 1H), 1.76 – 1.67 (m, 1H); *trans*: <sup>1</sup>H NMR (600 MHz, CDCl<sub>3</sub>): δ 7.44 – 4.40 (m, 4H), 7.36 – 7.25 (m, 6H), 7.18 (s, 1H), 6.60 (s, 1H), 5.14 – 5.03 (m, 4H), 4.42 (d, *J* = 8.6 Hz, 1H), 2.97 (t, *J* = 8.7 Hz, 1H), 2.78 (ddd, *J* = 17.0, 11.6, 5.7 Hz, 1H), 2.70 – 2.61 (m, 1H), 2.06 – 1.99 (m, 1H), 1.77 – 1.64 (m, 1H); ESI-MS: *m/z* 376.2 [M+H]<sup>+</sup>.

**6,7-Bis(benzyloxy)-2-(isopropylamino)-1,2,3,4-tetrahydronaphthalen-1-ol (14)**

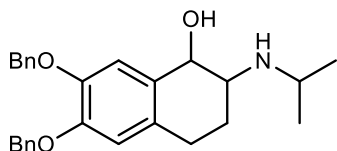

Compound **13** (80 mg, 213 μmol) was dissolved in 1,2-DCE (10 mL) in a dried flask, and to the solution was added acetone (1 mL), followed by NaBH(OAc)<sub>3</sub> (181 mg, 852 μmol). After 4 d, the reaction was diluted with CH<sub>2</sub>Cl<sub>2</sub> (20 mL), washed with 1 M K<sub>2</sub>CO<sub>3</sub> (2 × 20 mL) and brine, dried (Na<sub>2</sub>SO<sub>4</sub>) and evaporated to give a brown solid (85 mg, 96%). The crude compound was purified by preparative HPLC (Solvent A: 0.1% 0.1% TFA in H<sub>2</sub>O, Solvent B: MeCN; gradient 5 – 80% Solvent B over 17 min, product eluted at 13.9 min) and lyophilized to give a white solid (120 mg, 89%). The mixture of isomers was further purified by semi-preparative chiral HPLC (MeCN + 0.1% ethylenediamine) resulting in elution of four fractions at *t<sub>R</sub>* = 3.8 min (*trans*-1), 4.1 min (*cis*-2), 4.4 min (*cis*-1) and 4.8 min (*trans*-2). Assignment of the absolute configurations was done preliminarily based on HPLC comparison with the 5,6-dihydroxy-substituted analogs.

*trans*:  $^1\text{H}$  NMR (600 MHz,  $\text{CDCl}_3$ ):  $\delta$  7.49 – 7.40 (m, 4H), 7.39 – 7.27 (m, 6H), 7.19 (s, 1H), 6.64 (s, 1H), 5.18 – 5.09 (m, 4H), 4.46 (d,  $J = 8.8$  Hz, 1H), 3.25 – 3.17 (m, 1H), 3.00 (br s, 1H), 2.88 – 2.73 (m, 3H), 2.23 – 2.18 (m, 1H), 1.68 – 1.58 (m, 1H), 1.21 (d,  $J = 6.3$  Hz, 3H), 1.14 (d,  $J = 6.2$  Hz, 3H);  $^{13}\text{C}$  NMR (91 MHz,  $\text{CDCl}_3$ ):  $\delta$  148.5, 148.1, 137.6, 137.5, 130.7, 128.6, 128.6, 128.1, 127.9, 127.8, 127.6, 127.4, 114.9, 113.2, 71.9, 71.5 (d), 58.9, 46.9, 27.9, 26.0, 23.0, 21.4; *cis*:  $^1\text{H}$  NMR (600 MHz,  $\text{CDCl}_3$ )  $\delta$  7.49 – 7.41 (m, 4H), 7.39 – 7.34 (m, 4H), 7.32 – 7.28 (m, 2H), 7.07 (s, 1H), 6.68 (s, 1H), 5.20 – 5.10 (m, 4H), 4.50 (d,  $J = 4.0$  Hz, 1H), 3.06 – 2.99 (m, 2H), 2.80 – 2.69 (m, 2H), 1.97 – 1.84 (m, 1H), 1.70 – 1.62 (m, 1H), 1.13 (d,  $J = 6.3$  Hz, 3H), 1.12 (d,  $J = 6.3$  Hz, 3H);  $^{13}\text{C}$  NMR (91 MHz,  $\text{CDCl}_3$ ):  $\delta$  148.9, 147.9, 137.6, 137.5, 130.1, 129.2, 128.6, 128.6, 127.8, 127.8, 127.5, 127.4, 116.6, 115.0, 71.5, 71.5, 67.0, 54.5, 46.0, 27.4, 24.5, 23.8, 23.5; ESI-MS:  $m/z$  418.3  $[\text{M}+\text{H}]^+$ .

(1*R*,2*S*)-2-(isopropylamino)-1,2,3,4-tetrahydronaphthalene-1,6,7-triol trifluoroacetate (**1**)

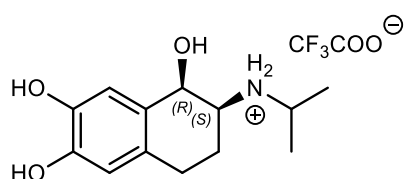

Compound **14** (*cis*-1, 7.52 mg, 0.018 mmol) was dissolved in methanol (8 mL). To this solution, 10% Pd/C (3.00 mg) was added and the formed suspension stirred under hydrogen atmosphere for 16 h. After filtration, and the filtrate was evaporated. The residue was purified by prep. HPLC (5-15% MeCN in water + 0.1% TFA over 15 min), to give **14** as a yellow oil (0.95 mg, 15% yield).

$^1\text{H}$  NMR (600 MHz,  $\text{CD}_3\text{OD}$ ):  $\delta$  6.79 (s, 1H), 6.56 (s, 1H), 4.69 (d,  $J = 2.6$  Hz, 1H), 3.66 (sept,  $J = 6.5$  Hz, 1H), 3.50 (dt,  $J = 12.6, 3.2$  Hz, 1H), 2.87 – 2.75 (m, 2H), 2.12 (qd,  $J = 12.3, 6.3$  Hz, 1H), 1.96 – 1.89 (m, 1H), 1.39 (d,  $J = 6.5$  Hz, 3H), 1.37 (d,  $J = 6.5$  Hz, 3H); ESI-HRMS: ( $m/z$ )  $[\text{MH}]^+$  calcd. for  $\text{C}_{13}\text{H}_{20}\text{NO}_3$ , 238.1438; found, 238.1439.

(1*S*,2*R*)-2-(isopropylamino)-1,2,3,4-tetrahydronaphthalene-1,6,7-triol trifluoroacetate (**2**)



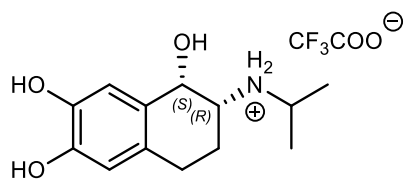

Compound **14** (*cis*-2, 12.0 mg, 0.029 mmol) was dissolved in methanol (8 mL). 10% Pd/C (3.00 mg) was added and the suspension was stirred under hydrogen atmosphere for 2 h. The reaction mixture was filtered, and the filtrate was evaporated. Pure product was obtained after purification by prep. HPLC (5-15% MeCN in water + 0.1% TFA over 15 min) as a white, amorphous solid (0.95 mg, 9% yield). For analytical data, see compound **1**.

*(1S,2S)*-2-(isopropylamino)-1,2,3,4-tetrahydronaphthalene-1,6,7-triol trifluoroacetate (**3**)

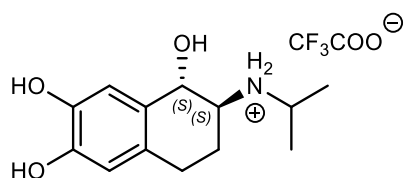

Compound **14** (*trans*-1, 5.00 mg, 0.012 mmol) was dissolved in methanol (4 mL). To the solution, 10% Pd/C (1.30 mg) was added and the formed suspension was stirred under hydrogen atmosphere for 2 h. The mixture was filtered, and the filtrate was evaporated. The pure product (**3**) was obtained after purification by prep. HPLC (5-15% MeCN in water + 0.1% TFA over 15 min) as a colorless oil (1.06 mg, 25% yield).

<sup>1</sup>H NMR (600 MHz, CD<sub>3</sub>OD): δ 6.96 (s, 1H), 6.53 (s, 1H), 4.57 (d, *J* = 8.7 Hz, 1H), 3.71 (sept, *J* = 6.5 Hz, 1H), 3.26 (ddd, *J* = 12.1, 8.9, 3.2 Hz, 1H), 2.86 (ddd, *J* = 16.8, 11.8, 5.2 Hz, 1H), 2.77 (ddd, *J* = 16.6, 5.1, 3.2 Hz, 1H), 2.32 – 2.23 (m, 1H), 1.82 (qd, *J* = 12.2, 5.5 Hz, 1H), 1.42 (d, *J* = 6.5 Hz, 3H), 1.37 (d, *J* = 6.5 Hz, 3H); ESI-HRMS: (*m/z*) [MH]<sup>+</sup> calcd. for C<sub>13</sub>H<sub>20</sub>NO<sub>3</sub>, 238.1438; found, 238.1439.

*(1R,2R)*-2-(isopropylamino)-1,2,3,4-tetrahydronaphthalene-1,6,7-triol trifluoroacetate (**4**)

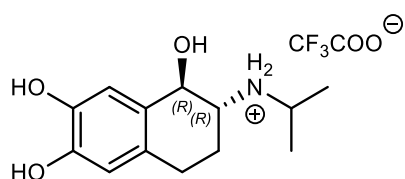

Compound **14** (*trans*-2) was deprotected as described for **3**. The mixture was filtered, and the filtrate was evaporated. The pure product (**4**) was obtained after purification by prep. HPLC (5-15% MeCN in water + 0.1% TFA over 15 min) as a clear oil. NMR data were identical to those observed for compound **3**.

*(2-Carboxyethyl)triphenylphosphonium bromide* (**15**)

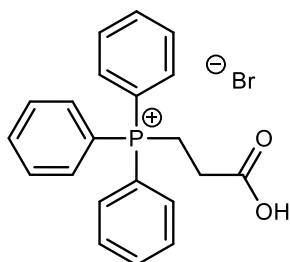

3-Bromopropionic acid (14.5 g, 94.8 mmol) was dissolved in acetonitrile (200 mL), and to the solution was added triphenylphosphine (27.4 g, 104 mmol). The solution was heated to reflux for 12 h. It was cooled to -5 °C on an ice/salt bath, and Et<sub>2</sub>O (200 mL) was added which caused a precipitate to emerge. After stirring for 1 h, the solid was collected by filtration and washed with Et<sub>2</sub>O (50 mL), to give pure **15** (33.2 g, 84%).

<sup>1</sup>H NMR (600 MHz, DMSO-*d*<sub>6</sub>): δ 12.73 (br s, 1H), 7.94 – 7.88 (m, 3H), 7.87 – 7.81 (m, 6H), 7.81 – 7.73 (m, 6H), 3.87 – 3.78 (m, 2H), 2.62 – 2.55 (m, 2H); <sup>13</sup>C NMR (151 MHz, DMSO-*d*<sub>6</sub>): δ 171.5, 171.4, 134.98, 134.96, 133.7, 133.6, 130.3, 130.2, 118.3, 117.8, 26.78, 26.77, 17.0, 16.7.

*4-(2,3-Dimethoxyphenyl)but-3-enoic acid* (**16**)

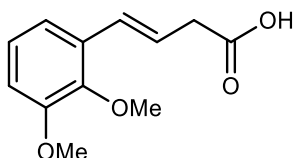

Sodium hydride (60% dispersion, 823 mg, 20.6 mmol) was added to a dried 2-neck flask, and with constant N<sub>2</sub> flow, was washed with hexane (2 × 5 mL). The remaining solid was dissolved in dry THF (15 mL) and dry DMSO (15 mL). To the mixture was slowly added compound **15** (4.27 g, 10.3 mmol), which caused foaming. After 5 min, 2,3-dimethoxybenzaldehyde (1.14 g, 6.86 mmol) was slowly added, and the mixture was allowed to stir under N<sub>2</sub> atmosphere

at r.t. After 2 h, the mixture was cooled on ice, and water was slowly added (40 mL). The precipitation was extracted with CH<sub>2</sub>Cl<sub>2</sub> (3 × 20 mL), and the remaining aqueous layer was acidified with conc. HCl. The product was extracted with Et<sub>2</sub>O (3 × 20 mL), and the combined organic layers were washed with brine, dried (Na<sub>2</sub>SO<sub>4</sub>) and evaporated to give a yellow oil. The product was purified by automated chromatography (gradient, *n*-hexane to 3:1 *n*-hexane/EtOAc) to give **16** as a white solid (930 mg, 61%).

<sup>1</sup>H NMR (360 MHz, CDCl<sub>3</sub>): δ 7.26 (s, 1H), 7.10 (dd, *J* = 7.9, 1.4 Hz, 1H), 7.00 (dd, *J* = 10.3, 5.7 Hz, 1H), 6.87 – 6.79 (m, 2H), 6.31 (dt, *J* = 16.0, 7.2 Hz, 1H), 3.86 (s, 3H), 3.81 (s, 3H), 3.33 (dd, *J* = 7.2, 1.4 Hz, 2H); <sup>13</sup>C NMR (151 MHz, CDCl<sub>3</sub>): δ 177.7, 153.1, 146.7, 131.0, 128.3, 124.2, 122.4, 118.3, 111.6, 61.1, 55.9, 38.5; ESI-MS: *m/z* 245.0 [M+Na]<sup>+</sup>.

#### 4-(2,3-Dimethoxyphenyl)butanoic acid (**17**)

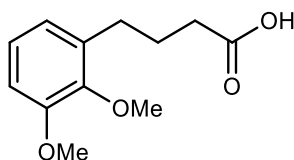

Compound **16** (4.80 g, 21.6 mmol) was dissolved in MeOH (80 mL) and added to a flask containing 10% Pd/C (2.30 g) in MeOH (10 mL). The mixture was stirred at r.t. under H<sub>2</sub> atmosphere. After 2 h, the mixture was filtered through celite, washed with MeOH (50 mL), and the filtrate was concentrated in vacuo to give **17** as a white solid (4.54 g, 94%).

<sup>1</sup>H NMR (600 MHz, CDCl<sub>3</sub>): δ 11.29 (br s, 1H), 6.99 (t, *J* = 7.9 Hz, 1H), 6.81 – 6.77 (m, 2H), 3.87 (s, 3H), 3.83 (s, 3H), 2.74 – 2.68 (m, 2H), 2.40 (t, *J* = 7.5 Hz, 2H), 2.00 – 1.90 (m, 2H); <sup>13</sup>C NMR (151 MHz, CDCl<sub>3</sub>): δ 180.0, 152.9, 147.3, 135.2, 124.0, 122.1, 110.6, 60.7, 55.8, 33.6, 29.2, 25.6; ESI-MS: *m/z* 247.0 [M+Na]<sup>+</sup>.

#### 5,6-Dimethoxy-3,4-dihydronaphthalen-1(2H)-one (**18**)

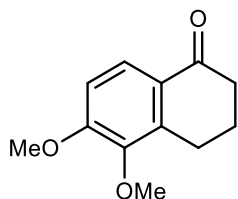

A 250 mL flask was charged with polyphosphoric acid (100 mL) and heated to 70 °C with mechanical stirring. Portions of compound **17** were added (4.62 g, 20.6 mmol) over 15 min.

After 1 h, the reaction was allowed to cool to r.t.. After 12 h, water (400 mL) was added and the mixture was extracted using EtOAc (3 × 100 mL). The combined organic layers were washed with brine, dried (Na<sub>2</sub>SO<sub>4</sub>) and evaporated to give **18** as a yellow solid (4.21 g, 99%). <sup>1</sup>H NMR (360 MHz, CDCl<sub>3</sub>): δ 7.85 (d, *J* = 8.7 Hz, 1H), 6.87 (d, *J* = 8.7 Hz, 1H), 3.92 (s, 3H), 3.81 (s, 3H), 2.95 (t, *J* = 6.1 Hz, 2H), 2.58 (dd, *J* = 7.2, 5.9 Hz, 2H), 2.15 – 2.04 (m, 2H); <sup>13</sup>C NMR (151 MHz, CDCl<sub>3</sub>): δ 197.6, 156.9, 145.5, 138.8, 126.8, 124.6, 110.2, 60.4, 55.9, 38.8, 23.4, 23.0; ESI-MS: *m/z* 207.0 [M+H]<sup>+</sup>.

**5,6-Dihydroxy-3,4-dihydronaphthalen-1(2H)-one (19)**

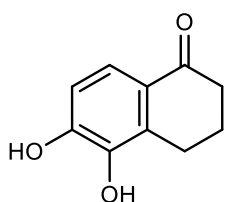

Compound **18** (1.90 g, 9.21 mmol) was dissolved in dry toluene (100 mL) which was degassed with N<sub>2</sub> for 15 min. To the solution was added AlCl<sub>3</sub> (6.14 g, 46.1 mmol). The mixture was heated to reflux for 1 h and subsequently cooled on ice. Then, water (30 mL) and 2 M HCl (30 mL) were sequentially added. The precipitate was collected by filtration and washed with water (30 mL). The solid was dried under vacuum to give pure **19** as a pale brown solid (1.15 g, 70%).

<sup>1</sup>H NMR (600 MHz, DMSO-*d*<sub>6</sub>): δ 10.14 (s, 1H), 8.57 (s, 1H), 7.31 (d, *J* = 8.4 Hz, 1H), 6.75 (d, *J* = 8.4 Hz, 1H), 2.78 (t, *J* = 6.1 Hz, 2H), 2.47 – 2.41 (m, 2H), 2.00 – 1.90 (m, 2H); <sup>13</sup>C NMR (151 MHz, CDCl<sub>3</sub>): δ 196.5, 149.9, 141.4, 132.3, 125.0, 113.2, 94.8, 38.2, 22.9, 22.5; ESI-MS: *m/z* 179.0 [M+H]<sup>+</sup>.

**5,6-Bis(benzyloxy)-3,4-dihydronaphthalen-1(2H)-one (20)**

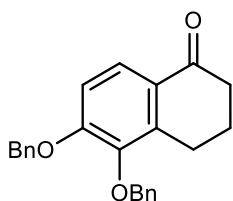

Benzyl bromide (2.30 mL, 19.4 mmol) was dissolved in acetone (80 mL) and NaI (2.13 g, 14.2 mmol) was added. After stirring at r.t. for 15 min, K<sub>2</sub>CO<sub>3</sub> was added (4.46 g, 32.3 mmol),

followed by addition of **19** (1.15 g, 6.45 mmol). The mixture was heated to reflux for 2 h. Water (100 mL) was added, the product was extracted with EtOAc (3 × 50 mL) and the combined layers were washed with brine, dried (Na<sub>2</sub>SO<sub>4</sub>) and evaporated. The residue was purified by recrystallization from methanol (40 mL), and residual mother liquor was purified by flash column chromatography (4:1 *n*-hexane/EtOAc) to give **20** as a solid (2.09 g, 90%).  
<sup>1</sup>H NMR (600 MHz, CDCl<sub>3</sub>): δ 7.86 (d, *J* = 8.7 Hz, 1H), 7.47 (d, *J* = 7.2 Hz, 2H), 7.43 – 7.32 (m, 8H), 6.99 (d, *J* = 8.7 Hz, 1H), 5.22 (s, 2H), 5.03 (s, 2H), 2.88 (t, *J* = 6.1 Hz, 2H), 2.60 – 2.52 (m, 2H), 2.07 – 1.98 (m, 2H); <sup>13</sup>C NMR (91 MHz, CDCl<sub>3</sub>) δ 197.6, 156.1, 144.5, 139.4, 137.5, 136.4, 128.8, 128.6, 128.5, 128.4, 128.3, 127.6, 127.1, 124.6, 111.7, 74.7, 70.8, 38.8, 23.8, 23.0; ESI-MS: *m/z* 359.2 [M+H]<sup>+</sup>.

**5,6-Bis(benzyloxy)-2-bromo-3,4-dihydronaphthalen-1(2H)-one (21)**

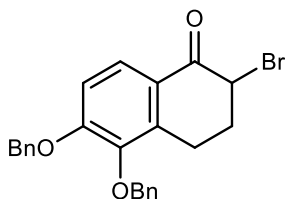

Compound **20** (410 mg, 1.14 mmol) was dissolved in Et<sub>2</sub>O (20 mL) and a solution of bromine (117 μL, 2.29 mmol) in Et<sub>2</sub>O (10 mL) was added to the stirred solution. After 1 h, 50% NaHCO<sub>3</sub> solution (20 mL) was slowly added, and the product was extracted with further Et<sub>2</sub>O (2 × 20 mL). The combined organic layers were washed with Na<sub>2</sub>S<sub>2</sub>O<sub>3</sub> (10% aq. solution, 30 mL), brine, dried with Na<sub>2</sub>SO<sub>4</sub> and concentrated in vacuo to give a mixture of the mono- and α,α-dibromo compounds. The crude product was dissolved in dry THF (10 mL) and cooled on ice. To this solution was dropwise added a solution of triethyl amine (167 μL, 1.20 mmol) and diethyl phosphite (154 μL, 1.20 mmol) in THF (10 mL) over a period of 10 min. After stirring for 16 h, water (20 mL) was added, and the product was extracted with EtOAc (2 × 20 mL). The combined organic layers were washed with brine, dried (Na<sub>2</sub>SO<sub>4</sub>), concentrated, and the residue was purified by flash column chromatography (5:1 *n*-hexane/EtOAc) to give **21** as a yellow oil (485 mg, 97%).

<sup>1</sup>H NMR (360 MHz, CDCl<sub>3</sub>): δ 7.91 (d, *J* = 8.8 Hz, 1H), 7.50 – 7.29 (m, 10H), 7.03 (d, *J* = 8.8 Hz, 1H), 5.23 (s, 2H), 5.06 (s, 2H), 4.64 (t, *J* = 4.2 Hz, 1H), 3.07 – 2.85 (m, 2H), 2.42 – 2.28

(m, 2H);  $^{13}\text{C}$  NMR (91 MHz,  $\text{CDCl}_3$ )  $\delta$  189.8, 156.7, 144.4, 138.1, 137.3, 136.1, 128.9, 128.6, 128.6, 128.5, 128.4, 127.6, 126.2, 124.0, 112.3, 74.7, 70.9, 50.4, 31.6, 20.7; ESI-MS:  $m/z$  437.1  $[\text{M}+\text{H}]^+$ .

**2-Azido-5,6-bis(benzyloxy)-3,4-dihydronaphthalen-1(2H)-one (22)**

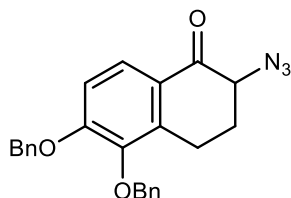

Compound **21** (1.44 g, 3.29 mmol) was dissolved in DMF (50 mL) and cooled on ice. To the stirred solution was added glacial acetic acid (226  $\mu\text{L}$ , 3.95 mmol), then after 5 min, a solution of sodium azide (428 mg, 6.59 mmol) in water (3 mL). After 3 h stirring at 0  $^\circ\text{C}$ , water (50 mL) was added, followed by  $\text{CH}_2\text{Cl}_2$  (40 mL), and the product was extracted with further  $\text{CH}_2\text{Cl}_2$  (2  $\times$  30 mL). The combined organic layers were washed with brine, dried ( $\text{MgSO}_4$ ) and concentrated in vacuo. The oil was then dissolved in  $\text{Et}_2\text{O}$  (30 mL) and the solution was washed with water (3  $\times$  50 mL), brine, dried ( $\text{Na}_2\text{SO}_4$ ) and evaporated to crude **22** (1.22 g, 93%), which could be immediately used for the next reaction step.

$^1\text{H}$  NMR (360 MHz,  $\text{CDCl}_3$ ):  $\delta$  7.88 (d,  $J = 8.7$  Hz, 1H), 7.49 – 7.29 (m, 10H), 7.02 (d,  $J = 8.8$  Hz, 1H), 5.23 (s, 2H), 5.07 – 4.97 (m, 2H), 4.12 (dd,  $J = 12.1, 4.7$  Hz, 1H), 3.14 (dt,  $J = 17.6, 4.4$  Hz, 1H), 2.75 – 2.62 (m, 1H), 2.25 (dq,  $J = 13.4, 4.5$  Hz, 1H), 2.04 – 1.85 (m, 1H);  $^{13}\text{C}$  NMR (91 MHz,  $\text{CDCl}_3$ ):  $\delta$  192.8, 156.7, 144.5, 138.3, 137.3, 136.1, 128.9, 128.6, 128.6, 128.5, 128.4, 127.6, 125.4, 125.3, 112.4, 74.8, 71.0, 64.1, 28.9, 22.1; ESI-MS:  $m/z$  400.2  $[\text{M}+\text{H}]^+$ .

**2-Amino-5,6-bis(benzyloxy)-1,2,3,4-tetrahydronaphthalen-1-ol (23)**

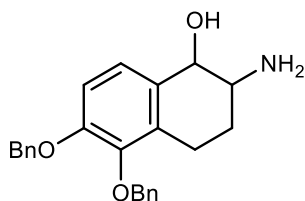

Compound **22** (550 mg, 1.38 mmol) was dissolved in 1,2-DCE (20 mL) and  $\text{LiAlH}_4$  (1 M solution in THF, 4.13 mL, 4.13 mmol) was added over a period of 1 h. After 4 h, the reaction

was cooled on ice and quenched with water (30 mL). The mixture was further diluted with CH<sub>2</sub>Cl<sub>2</sub> (50 mL), then filtered to remove solids. The product was further extracted with CH<sub>2</sub>Cl<sub>2</sub> (3 × 30 mL), and the combined organic layers were washed with brine, dried (Na<sub>2</sub>SO<sub>4</sub>) and concentrated to give **23** as a yellow oil (485 mg, 94%), in approximately 2:3 *cis/trans* ratio.

<sup>1</sup>H NMR (600 MHz, CD<sub>3</sub>OD): δ 7.51 – 7.45 (m, 4H), 7.40 – 7.27 (m, 16H), 7.24 (dd, *J* = 8.5, 0.9 Hz, 1H), 7.11 (d, *J* = 8.5 Hz, 1H), 7.07 – 7.01 (m, 2H), 5.16 (m, 4H), 5.02 – 4.95 (m, 4H), 4.55 (d, *J* = 3.4 Hz, 1H), 4.30 (d, *J* = 8.2 Hz, 1H), 3.06 – 2.97 (m, 2H), 2.93 – 2.83 (m, 2H), 2.69 – 2.53 (m, 2H), 2.04 – 1.99 (m, 1H), 1.90 – 1.83 (m, 1H), 1.83 – 1.76 (m, 1H), 1.65 – 1.56 (m, 1H); ESI-MS: *m/z* 376.1 [M+H]<sup>+</sup>.

**5,6-Bis(benzyloxy)-2-(isopropylamino)-1,2,3,4-tetrahydronaphthalen-1-ol (24)**

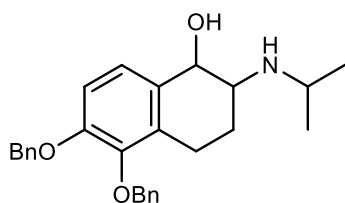

To a solution of **23** (100 mg, 266 μmol) in 1,2-DCE (10 mL), acetone (1 mL) and NaBH(OAc)<sub>3</sub> (226 mg, 1.07 mmol) were added. After 16 h, water (20 mL) was added, and the product was extracted with CH<sub>2</sub>Cl<sub>2</sub> (3 × 20 mL). The combined organic layers were washed with brine, dried (Na<sub>2</sub>SO<sub>4</sub>) and evaporated. The isomers were then isolated by semi-preparative chiral HPLC (80:20 *n*-hexane/*i*-PrOH + 0.1% EDA). Three peaks eluted at *t<sub>R</sub>* = 8.7 min for (*S,S*)-enantiomer (*trans*-1), 13.2 min for mixture of (*R,R*)- and (*R,S*)-enantiomers (*trans*-2, *cis*-1) and 16.5 min for (*S,R*)-enantiomer (*cis*-2), respectively.

*trans*: <sup>1</sup>H NMR (600 MHz, CDCl<sub>3</sub>): δ 7.46 (dd, *J* = 7.9, 0.8 Hz, 2H), 7.43 – 7.35 (m, 4H), 7.35 – 7.30 (m, 4H), 7.29 (d, *J* = 8.6 Hz, 1H), 6.94 (d, *J* = 8.6 Hz, 1H), 5.14 (s, 2H), 5.04 – 4.99 (m, 2H), 4.37 (d, *J* = 8.7 Hz, 1H), 3.09 (sept, *J* = 6.5 Hz, 1H), 2.97 (ddd, *J* = 17.7, 5.7, 3.2 Hz, 1H), 2.74 – 2.65 (m, 2H), 2.40 (br s, 3H), 2.17 (ddt, *J* = 12.7, 6.2, 3.1 Hz, 1H), 1.48 (dtd, *J* = 12.9, 11.2, 5.9 Hz, 1H), 1.16 (d, *J* = 6.3 Hz, 3H), 1.12 – 1.06 (m, 3H); <sup>13</sup>C NMR (91 MHz, CDCl<sub>3</sub>): δ 150.8, 145.5, 138.1, 137.3, 132.0, 130.7, 128.7, 128.5, 128.4, 128.0, 128.0, 127.6, 122.8, 112.9, 74.3, 72.7, 71.1, 58.1, 45.9, 26.1, 25.5, 24.3, 23.3, 22.5; *cis*: <sup>1</sup>H NMR (600 MHz,

CDCl<sub>3</sub>):  $\delta$  7.46 (d,  $J$  = 7.2 Hz, 2H), 7.44 – 7.29 (m, 8H), 7.19 (d,  $J$  = 8.4 Hz, 1H), 6.95 (d,  $J$  = 8.4 Hz, 1H), 5.15 (s, 2H), 5.05 (d,  $J$  = 10.9 Hz, 1H), 5.01 (d,  $J$  = 10.9 Hz, 1H), 4.56 (d,  $J$  = 3.8 Hz, 1H), 3.05 – 2.92 (m, 3H), 2.64 (ddd,  $J$  = 17.2, 10.4, 6.1 Hz, 1H), 1.87 (dtd,  $J$  = 12.7, 10.5, 5.7 Hz, 1H), 1.68 – 1.62 (m, 1H), 1.12 (t,  $J$  = 6.7 Hz, 6H); <sup>13</sup>C NMR (91 MHz, CDCl<sub>3</sub>):  $\delta$  151.2, 145.6, 138.1, 137.3, 131.1, 131.0, 128.7, 128.5, 128.4, 128.0, 128.0, 127.6, 126.3, 113.0, 74.3, 71.1, 67.1, 54.3, 46.0, 24.0, 23.9, 23.5, 22.6; ESI-MS:  $m/z$  418.3 [M+H]<sup>+</sup>.

*(1S,2R)*-6-(Isopropylamino)-5,6,7,8-tetrahydronaphthalene-1,2,5-triol trifluoroacetate (**6**)

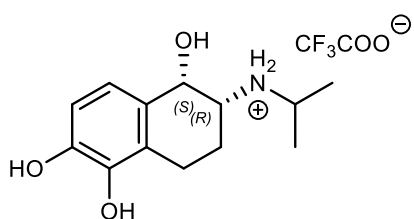

Compound **24** (*cis*-2, 15 mg, 36  $\mu$ mol) was dissolved in methanol (4 mL). To this solution 10% Pd/C (1.5 mg) was added and the formed suspension was stirred under hydrogen atmosphere for 1 h. The mixture was filtered, and the filtrate was evaporated. The pure product was obtained after purification by prep. HPLC (5-15% MeCN in water + 0.1% TFA over 15 min) as a white, amorphous solid (4.60 mg, 54% yield). The absolute configuration was determined by derivatization of the benzyl-protected precursor with Mosher's reagent (*O*-acylation) and subsequent <sup>1</sup>H NMR studies<sup>10</sup>.

*(1S,2S)*-6-(Isopropylamino)-5,6,7,8-tetrahydronaphthalene-1,2,5-triol trifluoroacetate (**7**)

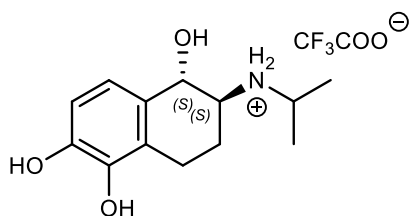

Compound **24** (*trans*-1, 12 mg, 28.7  $\mu$ mol) was dissolved in methanol (4 mL). To this solution 10% Pd/C (1.2 mg) was added and the formed suspension stirred under hydrogen atmosphere for 1 h. The mixture was filtered, and the filtrate was evaporated. Pure **7** was



obtained after purification by prep. HPLC (5-15% MeCN in water + 0.1% TFA over 15 min) as a white, amorphous solid (3.20 mg, 47% yield).

$^1\text{H}$  NMR (600 MHz,  $\text{CD}_3\text{OD}$ ):  $\delta$  6.91 (dd,  $J = 8.4, 0.7$  Hz, 1H), 6.74 (d,  $J = 8.3$  Hz, 1H), 4.61 (d,  $J = 9.0$  Hz, 1H), 3.72 (sept,  $J = 6.6$  Hz, 1H), 3.27 (ddd,  $J = 12.1, 9.0, 3.2$  Hz, 1H), 3.02 (ddd,  $J = 17.6, 5.6, 3.0$  Hz, 1H), 2.73 (ddd,  $J = 17.5, 11.6, 5.8$  Hz, 1H), 2.35 (ddt,  $J = 12.4, 6.0, 3.1$  Hz, 1H), 1.81 (qd,  $J = 12.0, 5.7$  Hz, 1H), 1.43 (d,  $J = 6.6$  Hz, 3H), 1.38 (d,  $J = 6.6$  Hz, 3H);  $^{13}\text{C}$  NMR (150 MHz,  $\text{CD}_3\text{OD}$ ):  $\delta$  143.2, 129.9, 123.7, 118.9, 114.6, 71.3, 60.2, 50.1, 24.6, 23.0, 19.9, 19.0; ESI-HRMS ( $m/z$ ):  $[\text{MH}]^+$  calcd. for  $\text{C}_{13}\text{H}_{19}\text{NO}_3$ , 238.1438; found, 238.1435.

(1*R*,2*R*)-6-(isopropylamino)-5,6,7,8-tetrahydronaphthalene-1,2,5-triol trifluoroacetate (**8**) and (1*R*,2*S*)-6-(isopropylamino)-5,6,7,8-tetrahydronaphthalene-1,2,5-triol trifluoroacetate (**5**)

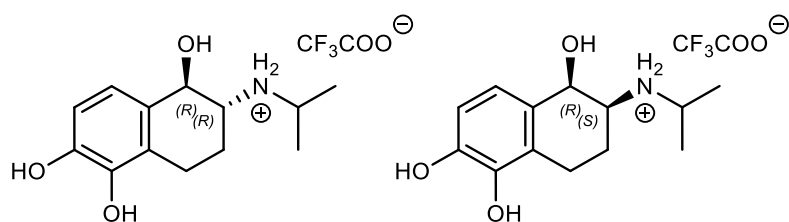

Compound **24** (mixture of *trans*-2 and *cis*-1, 77 mg, 0.18 mmol) was dissolved in ethanol (10 mL). To this solution was added 10% Pd/C (8.00 mg) and the formed suspension stirred under hydrogen atmosphere for 90 min. The mixture was filtered, and the filtrate was evaporated. The products were obtained after preparative HPLC (5-15% MeCN in water + 0.1% TFA over 15 min, two peaks, *trans* eluted at  $t_R = 9.1$  min, *cis* eluted at  $t_R = 10.1$  min) as white solids (37.0 mg, 61% for **8**, 8.00 mg, 13% for **5**).

**5**:  $^1\text{H}$  NMR (600 MHz,  $\text{CD}_3\text{OD}$ ):  $\delta$  6.76 (d,  $J = 8.3$  Hz, 1H), 6.73 (d,  $J = 8.2$  Hz, 1H), 4.76 (dd,  $J = 3.2, 1.0$  Hz, 1H), 3.67 (sept,  $J = 6.5$  Hz, 1H), 3.50 (dt,  $J = 12.7, 3.3$  Hz, 1H), 3.09 (ddd,  $J = 17.6, 5.8, 1.8$  Hz, 1H), 2.68 – 2.60 (m, 1H), 2.12 (qd,  $J = 12.5, 5.9$  Hz, 1H), 2.04 – 1.96 (m, 1H), 1.40 (d,  $J = 6.5$  Hz, 3H), 1.38 (d,  $J = 6.5$  Hz, 3H);  $^{13}\text{C}$  NMR (150 MHz,  $\text{CD}_3\text{OD}$ ):  $\delta$  146.0, 128.5, 124.0, 122.7, 114.6, 65.6, 56.7, 48.3, 23.2, 21.2, 20.1, 19.0; ESI-HRMS ( $m/z$ ):  $[\text{MH}]^+$  calcd. for  $\text{C}_{13}\text{H}_{19}\text{NO}_3$ , 238.1438; found, 238.1435; **8**: see, compound **7**.

*tert*-butyl-((1*RS*,2*RS*)-5,6-bis(benzyloxy)-1-hydroxy-1,2,3,4-tetrahydronaphthalen-2-yl) carbamate (**25**)

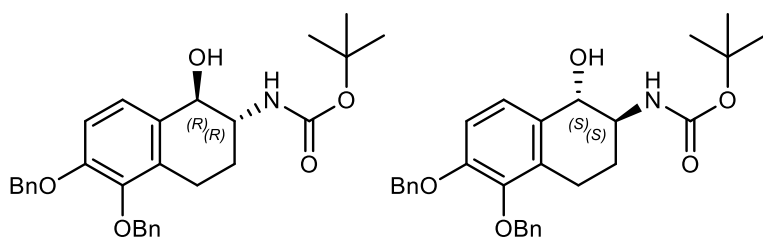

Compound **23** *cis/trans*-mixture (4.00 g, 10.6 mmol, approx. 70% *trans*) was dissolved in anhydrous CH<sub>2</sub>Cl<sub>2</sub> (100 mL). After addition of *N,N*-diisopropylethylamine (3.62 mL, 21.3 mmol), Boc<sub>2</sub>O (4.65 g, 21.3 mmol) was added under a stream of nitrogen and the reaction mixture was thereafter stirred overnight (18 h). It was evaporated and the residue was purified by flash column chromatography (isohexane/acetone 5:1 to 2:1), yielding a product enriched with the *trans*-isomers (>90%). After recrystallization of the beige-pink solid (toluene/isohexane 2:1), a white, diastereomerically pure powder was obtained (3.01 g, 60% yield). Small amounts of *trans*-compound can be separated on chiral, preparative HPLC (ChiralPak IC) with acetonitrile as eluent, giving first (*R,R*)- and second (*S,S*)-enantiomer.

mp: 164–168 °C; TLC: *R<sub>f</sub>* = 0.41 for *cis*, 0.35 for *trans* (iso-hexane:acetone 2:1 v/v); [α]<sub>D</sub><sup>23</sup>: +49.8 (c 0.46 in CHCl<sub>3</sub>) for *R,R*-enantiomer; <sup>1</sup>H NMR (600 MHz, CDCl<sub>3</sub>): δ 7.45 (m, 2H), 7.40 – 7.36 (m, 4H), 7.35 – 7.30 (m, 4H), 7.24 (d, *J* = 8.5 Hz, 1H), 6.95 (d, *J* = 8.6 Hz, 1H), 5.14 (s, 2H), 5.05 (d, *J* = 11.0 Hz, 1H), 5.00 (d, *J* = 11.0 Hz, 1H), 4.64 (br s, 1H), 4.52 (d, *J* = 7.1 Hz, 1H), 3.80 – 3.73 (m, 1H), 2.82 (ddd, *J* = 17.7, 5.5, 5.5 Hz, 1H), 2.73 (ddd, *J* = 17.9, 9.0, 6.0 Hz, 1H), 2.12 – 2.05 (m, 1H), 1.67 (dddd, *J* = 13.1, 9.4, 9.4, 5.9 Hz, 1H), 1.46 (s, 9H).; <sup>13</sup>C NMR (151 MHz, CDCl<sub>3</sub>): δ 156.8, 151.0, 145.2, 137.9, 137.2, 131.2, 130.6, 128.7, 128.5, 128.1, 128.1, 127.6, 124.3, 113.1, 80.2, 74.4, 73.4, 71.0, 53.5, 28.5, 25.8, 22.1 (Carbonyl signal not visible); ESI-MS: *m/z* 498.0 [M+Na]<sup>+</sup>.

*tert*-butyl-((1*R*,2*R*)-5,6-bis(benzyloxy)-1-(((*R*)-1-phenylethyl)carbamoyl)oxy)-1,2,3,4-tetrahydronaphthalen-2-yl)carbamate (**26**)

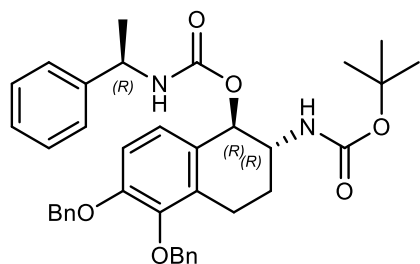

To a solution of compound **25** (7.00 g, 14.7 mmol) in absolute  $\text{CH}_2\text{Cl}_2$  (150 mL) were added 2-3 drops of dibutyltin dilaurate and subsequently (*R*)-methylbenzyl isocyanate (2.49 mL, 17.7 mmol, *ee* >98%). The clear solution was stirred under nitrogen atmosphere at r.t. for 7 d. It was quenched with 2 M NaOH solution (50 mL, stirring for 30 min), the organic layer was separated and the aqueous layer was extracted again with  $\text{CH}_2\text{Cl}_2$ . The pooled, organic fractions were washed with water (2x), dried ( $\text{MgSO}_4$ ) and evaporated, to give a beige powder in quantitative yield. The crude mixture of isomers was recrystallized from toluene/isohexane (1:1), allowing the hot and clear solution to cool down slowly over the course of several hours. After complete precipitation, the white powder was filtered under vacuum, washed with isohexane/toluene (4:1), followed by pure isohexane, yielding a residue consisting of 90% (*R,R,R*)-isomer (5.47 g). After a second recrystallization (toluene/isohexane 5:1, ~240 mL of solvent), analytically pure (*R,R,R*)-compound was obtained as a white powder (3.90 g, 85%, yield calcd. for single diastereomer).

mp: 174–176 °C; TLC:  $R_f$  = 0.42 (*iso*-hexane:acetone 2:1 v/v), diastereomer separation visible after 4x development of plate with toluene/ MTBE 7:1;  $[\alpha]_D^{24}$ : - 9.4 (*c* 0.85 in  $\text{CH}_2\text{Cl}_2$ );  $^1\text{H}$  NMR (400 MHz,  $\text{DMSO-}d_6$ ):  $\delta$  7.76 (d,  $J$  = 8.3 Hz, 1H), 7.48 (d,  $J$  = 6.8 Hz, 2H), 7.43 – 7.29 (m, 12H), 7.27 – 7.20 (m, 1H), 6.99 (d,  $J$  = 8.6 Hz, 1H), 6.85 (d,  $J$  = 8.2 Hz, 1H), 6.78 (d,  $J$  = 8.6 Hz, 1H), 5.60 (d,  $J$  = 6.9 Hz, 1H), 5.15 (s, 2H), 5.01 – 4.88 (m, 2H), 4.71 (m, 1H), 3.77 – 3.66 (m, 1H), 2.90 – 2.78 (m, 1H), 2.63 (ddd,  $J$  = 17.7, 6.5, 6.5 Hz, 1H), 1.95 – 1.85 (m, 1H), 1.80 – 1.67 (m, 1H), 1.39 (s, 9H), 1.33 (d,  $J$  = 7.1 Hz, 3H);  $^{13}\text{C}$  NMR (151 MHz,  $\text{DMSO-}d_6$ ):  $\delta$  155.6, 155.1, 150.5, 145.1, 144.4, 137.7, 137.1, 131.3, 128.4, 128.2, 128.2, 128.0, 127.8, 127.6, 126.5, 125.7, 124.2, 112.3, 77.7, 73.3, 71.7, 69.9, 50.2, 49.8, 28.2, 25.2, 22.9, 21.0; Chiral HPLC: System Ch1:  $t_R$  = 12.6 min, *de* >99.5%; ESI-MS:  $m/z$  645.3 [ $\text{M}+\text{Na}$ ] $^+$ .

(1*R*,2*R*)-5,6-bis(benzyloxy)-2-(methylamino)-1,2,3,4-tetrahydronaphthalen-1-ol (**27**)

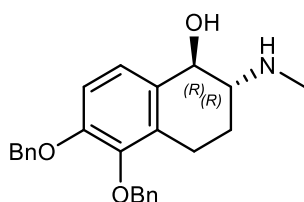

To a solution of compound **26** (60 mg, 0.096 mmol) in THF (2 mL) was added 4 M LiAlH<sub>4</sub> solution in Et<sub>2</sub>O (145  $\mu$ L, 0.58 mmol, 6 eq.) and the resulting reaction mixture was heated to 85 °C for 1 h. After careful addition of water and extraction with CH<sub>2</sub>Cl<sub>2</sub> (3x), the combined organic layers were washed with brine, dried over MgSO<sub>4</sub> and evaporated. The resulting crude solid was purified by flash column chromatography (gradient, CH<sub>2</sub>Cl<sub>2</sub> to CH<sub>2</sub>Cl<sub>2</sub>/MeOH 9:1) to yield a beige powder (23.1 mg, 62% yield).

Alternative: **27** can also be synthesized from (*R,R*)-**25** using 3 eq. of LiAlH<sub>4</sub>-solution, obtaining yields of >80% of *N*-methylamine, after column chromatography.

TLC:  $R_f$  = 0.08 (CH<sub>2</sub>Cl<sub>2</sub>:MeOH 9:1 v/v + 0.1% 25% NH<sub>3</sub>(aq));  $[\alpha]_D^{23}$ : +14.1 (c 0.47 in CHCl<sub>3</sub>);  
<sup>1</sup>H NMR (600 MHz, CD<sub>3</sub>OD):  $\delta$  7.48 (m, 2H), 7.38 – 7.34 (m, 4H), 7.34 – 7.28 (m, 4H), 7.22 (d,  $J$  = 8.6 Hz, 1H), 7.03 (d,  $J$  = 8.6 Hz, 1H), 5.15 (s, 2H), 4.99 (d,  $J$  = 10.8 Hz, 1H), 4.97 (d,  $J$  = 10.8 Hz, 1H), 4.40 (d,  $J$  = 7.9 Hz, 1H), 2.86 (ddd,  $J$  = 17.6, 5.1, 5.1 Hz, 1H), 2.65 – 2.58 (m, 2H), 2.46 (s, 3H), 2.16 – 2.09 (m, 1H), 1.50 (dddd,  $J$  = 13.2, 10.4, 10.4, 5.6 Hz, 1H); <sup>13</sup>C NMR (101 MHz, CD<sub>3</sub>OD):  $\delta$  152.0, 146.0, 139.1, 138.6, 133.0, 132.1, 129.7, 129.5, 129.3, 129.0, 129.0, 128.8, 124.7, 113.7, 75.2, 72.5, 71.8, 63.0, 33.3, 24.8, 23.1; Chiral HPLC: System Ch1:  $t_R$  = 29.3 min, ee > 99.5%; ESI-MS:  $m/z$  390.2 [M+H]<sup>+</sup>.

(5*R*,6*R*)-6-(methylamino)-5,6,7,8-tetrahydronaphthalene-1,2,5-triol trifluoroacetate ((*R,R*)-**c-Epi**)

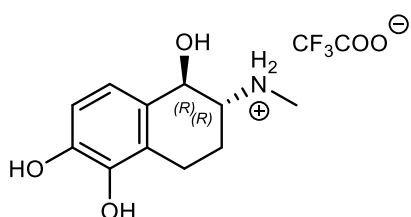

To a solution of **27** (230 mg, 0.59 mmol) in ethanol (15 mL) was added 10% Pd/C (23.0 mg) and the resulting suspension was stirred under hydrogen atmosphere for 2 h. The mixture was filtered through a syringe filter into 0.3% aqueous TFA (50 mL), and the formed solution was frozen and lyophilized. The crude TFA salt was purified by prep. HPLC (0.1% TFA in water + 3% acetonitrile to 10% acetonitrile in 10 min., 12 mL/min. flowrate, peak eluted at 5.0 min) to give **(R,R)-c-Epi** as a white powder (142 mg, 74% yield).

<sup>1</sup>H NMR (600 MHz, CD<sub>3</sub>OD): δ 6.89 (d, *J* = 8.3 Hz, 1H), 6.73 (d, *J* = 8.3 Hz, 1H), 4.63 (d, *J* = 8.9 Hz, 1H), 3.15 (ddd, *J* = 11.8, 8.8, 3.0 Hz, 1H), 3.00 (ddd, *J* = 17.7, 5.9, 3.4 Hz, 1H), 2.79 (s, 3H), 2.73 (ddd, *J* = 17.5, 11.0, 6.1 Hz, 1H), 2.36 (dddd, *J* = 12.8, 6.3, 3.2, 3.2 Hz, 1H), 1.82 (dddd, *J* = 12.0, 12.0, 12.0, 5.8 Hz, 1H); <sup>13</sup>C NMR (151 MHz, CD<sub>3</sub>OD): δ 145.2, 143.2, 129.6, 123.5, 118.9, 114.6, 70.5, 63.3, 31.1, 23.2, 22.8; ESI-HRMS (*m/z*): [MH]<sup>+</sup> calcd. for C<sub>11</sub>H<sub>16</sub>NO<sub>3</sub>, 210.1125; found, 210.1124; HPLC: System 1: *t*<sub>R</sub> = 4.1 min, purity 99%, System 2: *t*<sub>R</sub> = 4.8 min, purity 98%.

**(1R,2R)-2-amino-5,6-bis(benzyloxy)-1,2,3,4-tetrahydronaphthalen-1-ol (28)**

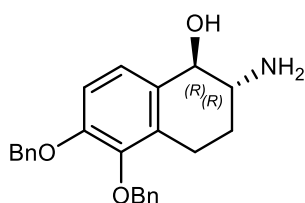

To a solution of **26** (1.08 g, 1.74 mmol) in THF (20 mL) was added 1 M TBAF solution (8.00 mL, 8.00 mmol). The mixture was heated to 90 °C for 4 h. Another portion of 1 M TBAF solution was added (6.00 mL, 6.00 mmol) and heating was continued for 6 h. The reaction was diluted with water (200 mL) and extracted with CH<sub>2</sub>Cl<sub>2</sub> (3x). The organic layers were washed with water (3x), dried (MgSO<sub>4</sub>) and evaporated. The resulting crude solid was purified by flash column chromatography (gradient, CH<sub>2</sub>Cl<sub>2</sub> to CH<sub>2</sub>Cl<sub>2</sub>/MeOH 9:1) to yield **28** as a beige powder (592 mg, 91% yield). The absolute configuration was determined by derivatization with Mosher's reagent (*N*-acylation) and subsequent <sup>1</sup>H NMR studies<sup>10</sup>.

Alternatively, **28** can be synthesized from (*R,R*)-**25** using 3-5 eq. of TBAF solution in almost quantitative yield.

TLC:  $R_f = 0.05$  ( $\text{CH}_2\text{Cl}_2:\text{MeOH}$  9:1 v/v + 0.1% 25%  $\text{NH}_3(\text{aq})$ );  $^1\text{H}$  NMR (400 MHz,  $\text{CD}_3\text{OD}$ ):  $\delta$  7.51 – 7.45 (m, 2H), 7.41 – 7.28 (m, 8H), 7.26 (dd,  $J = 8.6, 1.0$  Hz, 1H), 7.07 (d,  $J = 8.6$  Hz, 1H), 5.16 (s, 2H), 5.01 (d,  $J = 10.8$  Hz, 1H), 4.97 (d,  $J = 10.8$  Hz, 1H), 4.47 (d,  $J = 8.9$  Hz, 1H), 3.06 (ddd,  $J = 12.0, 8.9, 3.3$  Hz, 1H), 2.95 (ddd,  $J = 17.8, 5.7, 3.1$  Hz, 1H), 2.67 (ddd,  $J = 17.6, 11.3, 6.0$  Hz, 1H), 2.12 (dddd,  $J = 12.7, 6.2, 3.2, 3.2$  Hz, 1H), 1.73 (dddd,  $J = 12.9, 11.5, 11.5, 5.8$  Hz, 1H); ESI-MS:  $m/z$  376.2  $[\text{M}+\text{H}]^+$ .

*(5R,6R)*-6-amino-5,6,7,8-tetrahydronaphthalene-1,2,5-triol trifluoroacetate (**(*R,R*)-c-NorEpi**)

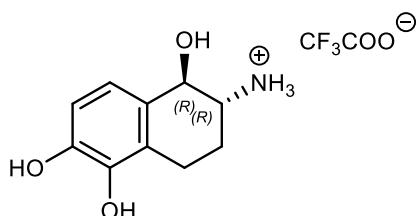

To a solution of **28** (50.0 mg, 0.13 mmol) in ethanol (3 mL) was added 10% Pd/C (5.00 mg) and the resulting suspension was stirred under hydrogen atmosphere for 1 h. The mixture was filtered through a syringe filter into 0.3% aqueous TFA (30 mL), and the formed solution was frozen and lyophilized. The crude TFA salt was purified by prep. HPLC (0.1% TFA in water + 2% acetonitrile, 12 mL/min. flowrate, peak eluted at 3.8 min) to give **(*R,R*)-c-NorEpi** as a beige powder (13.8 mg, 33% yield).

$^1\text{H}$  NMR (400 MHz,  $\text{CD}_3\text{OD}$ ):  $\delta$  6.89 (d,  $J = 8.3$  Hz, 1H), 6.73 (d,  $J = 8.3$  Hz, 1H), 4.55 (d,  $J = 8.9$  Hz, 1H), 3.20 (ddd,  $J = 12.0, 8.9, 3.0$  Hz, 1H), 2.97 (ddd,  $J = 17.8, 6.0, 2.9$  Hz, 1H), 2.72 (ddd,  $J = 17.6, 11.3, 6.0$  Hz, 1H), 2.24 (dddd,  $J = 12.6, 6.2, 3.1, 3.1$  Hz, 1H), 1.86 (dddd,  $J = 12.8, 11.5, 11.5, 6.1$  Hz, 1H);  $^{13}\text{C}$  NMR (151 MHz,  $\text{CD}_3\text{OD}$ ):  $\delta$  145.2, 143.2, 129.8, 123.6, 118.8, 114.5, 71.6, 55.7, 26.0, 22.8; ESI-HRMS ( $m/z$ ):  $[\text{MH}]^+$  calcd. for  $\text{C}_{10}\text{H}_{14}\text{NO}_3$ , 196.0968; found, 196.0967; HPLC: System 1:  $t_R = 4.0$  min, purity 98%, System 2:  $t_R = 4.1$  min, purity 95%.

(5*R*,6*R*)-6-(isopropylamino)-5,6,7,8-tetrahydronaphthalene-1,2,5-triol trifluoroacetate (**8**,  
(*R,R*)-c-ISO))

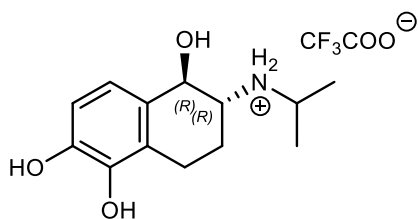

Alternative procedure: To a solution of **28** (40.0 mg, 0.106 mmol) in CH<sub>2</sub>Cl<sub>2</sub> (2 mL) was added acetone (100 μL, 1.34 mmol) and sodium triacetoxyborohydride (67.0 mg, 0.32 mmol). The suspension was stirred for 1 h at room temperature. After addition of sat. NaHCO<sub>3</sub> solution and extraction with CH<sub>2</sub>Cl<sub>2</sub> (3x), the combined, organic layers were washed with brine, dried (MgSO<sub>4</sub>) and evaporated. The crude compound was purified by flash column chromatography (CH<sub>2</sub>Cl<sub>2</sub> to CH<sub>2</sub>Cl<sub>2</sub>/ methanol 100:1 to 25:1) to give a white powder (35.1 mg, 79% yield). To a solution of this intermediate (26.0 mg, 0.062 mmol) in ethanol (3 mL) was added Pd/C 10% (3.0 mg) and the resulting suspension was stirred under hydrogen atmosphere for 2 h. After filtration and addition of 0.1% TFA, the solution was frozen and lyophilized. The residue was purified by preparative HPLC (10 mL/min, 0.1% TFA + 5% acetonitrile to 30% at 6 min, peak eluted at 4.5 min) to give (*R,R*)-c-ISO (**8**) as a white powder (10.2 mg, 48% yield).

### Supplementary References:

- 1 Xu, X. *et al.* Binding pathway determines norepinephrine selectivity for the human beta1AR over beta2AR *Cell Res* **31**, 569-579, doi:10.1038/s41422-020-00424-2 (2021).
- 2 van der Westhuizen, E. T., Breton, B., Christopoulos, A. & Bouvier, M. Quantification of ligand bias for clinically relevant beta2-adrenergic receptor ligands: implications for drug taxonomy. *Mol Pharmacol* **85**, 492-509, doi:10.1124/mol.113.088880 (2014).
- 3 Zhang, F., Yao, D., Hua, Y., van Breemen, R. B. & Bolton, J. L. Synthesis and Reactivity of the Catechol Metabolites from the Equine Estrogen, 8,9-Dehydroestrone. *Chemical Research in Toxicology* **14**, 754-763, doi:10.1021/tx010049y (2001).

- 4 Macchia, B. *et al.* Conformational Effects on the Activity of Drugs. 13. A Revision of Previously Proposed Models for the Activation of  $\alpha$ - and  $\beta$ -Adrenergic Receptors *J. Med. Chem.* **35**, 1009-1018 (1992).
- 5 Bonner, L. A. *et al.* Mapping the Catechol Binding Site in Dopamine D1 Receptors: Synthesis and Evaluation of Two Parallel Series of Bicyclic Dopamine Analogues. *ChemMedChem* **6**, 1024-1040, doi:<https://doi.org/10.1002/cmdc.201100010> (2011).
- 6 Itoh, K. *et al.* The Syntheses and  $\beta$ -Adrenoceptor Activities of N-Substituted 2-Amino-5, 6-dihydroxy-1, 2, 3, 4-tetrahydro-1-naphthalenols. *CHEMICAL & PHARMACEUTICAL BULLETIN* **25**, 2917-2928, doi:10.1248/cpb.25.2917 (1977).
- 7 Oka, Y. *et al.* Syntheses of conformationally Rigid Catecholamine Derivatives. *CHEMICAL & PHARMACEUTICAL BULLETIN* **25**, 632-639, doi:10.1248/cpb.25.632 (1977).
- 8 Labafzadeh, S. R., Kavakka, J. S., Vyavaharkar, K., Sievänen, K. & Kilpeläinen, I. Preparation of cellulose and pulp carbamates through a reactive dissolution approach. *RSC Advances* **4**, 22434-22441, doi:10.1039/C4RA02316A (2014).
- 9 Routier, S., Saugé, L., Ayerbe, N., Coudert, G. & Mérour, J.-Y. A mild and selective method for N-Boc deprotection. *Tetrahedron Letters* **43**, 589-591, doi:[https://doi.org/10.1016/S0040-4039\(01\)02225-0](https://doi.org/10.1016/S0040-4039(01)02225-0) (2002).
- 10 Hoyer, T. R., Jeffrey, C. S. & Shao, F. Mosher ester analysis for the determination of absolute configuration of stereogenic (chiral) carbinol carbons. *Nature Protocols* **2**, 2451-2458, doi:10.1038/nprot.2007.354 (2007).
